# Supplementary material
Source: PubMed Central journal article supplement (PMC6137518)
Supplement: jamasurg-153-e181167-s001.pdf [file jamasurg-153-e181167-s001.pdf]

## Supplementary Online Content

Ricci C, Pagano N, Taffurelli G, et al. Comparison of efficacy and safety of 4 combinations of laparoscopic and intraoperative techniques for management of gallstone disease with biliary duct calculi: a systematic review and network meta-analysis. *JAMA Surg*. Published online May 30, 2018. doi:10.1001/jamasurg.2018.1167

### **eAppendix.** Methods

**eFigure 1.** PRISMA Flow Diagram

**eFigure 2.** Quality Assessment of the Study Based on the Cochrane Collaboration Tool for Assessing Risk of Bias in Randomized Trials

**eFigure 3.** Network Geometry of All Outcomes

**eFigure 4.** Contribution Plots of All Outcomes

**eFigure 5.** Forest Plots of All Outcomes

**eFigure 6.** Cluster Rank Combined the Surface Under the Cumulative Ranking Curve (SUCRA) Values, Success Rate and Mortality Rate

**eFigure 7.** Funnel Plots of the Network Estimates of All Outcomes

**eTable 1.** Covariate Potential Source of Heterogeneity in the Studies Included

**eTable 2.** The Ranking of the Approaches Ranking for All Outcomes

**eTable 3.** Meta-regression of Confounding Covariates Influencing Heterogeneity

### **References.**

This supplementary material has been provided by the authors to give readers additional information about their work.

## **eAppendix. Methods**

### **Information sources and search strategy**

A systematic literature search was conducted in order to identify all online published studies, comparing all types of endoscopic or surgical managements of gallstones associated with biliary duct calculi, using the Medline, Scopus and the ISI-Web of Science databases. The last search was carried out on September 14<sup>th</sup>, 2017. The bibliographies of the studies and related reviews were included for additional references. The following search terms were used in several logical combinations: “(LCBDE[All Fields] OR LC[All Fields] OR preoperative-ERCP[All Fields] OR (“postoperative period”[MeSH Terms] OR (“postoperative”[All Fields] AND “period”[All Fields]) OR “postoperative period”[All Fields] OR (“post”[All Fields] AND “operative”[All Fields]) OR “post operative”[All Fields]) AND (“cholangiopancreatography, endoscopic retrograde”[MeSH Terms] OR (“cholangiopancreatography”[All Fields] AND “endoscopic”[All Fields] AND “retrograde”[All Fields]) OR “endoscopic retrograde cholangiopancreatography”[All Fields] OR “ercp”[All Fields])) OR (“Rendezvous (Buffalo)”[Journal] OR “rendezvous”[All Fields]) OR (intraoperative[All Fields] AND (“cholangiopancreatography, endoscopic retrograde”[MeSH Terms] OR (“cholangiopancreatography”[All Fields] AND “endoscopic”[All Fields] AND “retrograde”[All Fields]) OR “endoscopic retrograde cholangiopancreatography”[All Fields] OR “ercp”[All Fields])) OR one-stage[All Fields] OR two-stage[All Fields] OR single-stage[All Fields]) AND (“gallstones”[MeSH Terms] OR “gallstones”[All Fields] OR “gallstone”[All Fields]) OR (“calculi”[MeSH Terms] OR “calculi”[All Fields] OR “stone”[All Fields]) OR (“calculi”[MeSH Terms] OR “calculi”[All Fields]) OR (CBD[All Fields] AND (“calculi”[MeSH Terms] OR “calculi”[All Fields] OR “stone”[All Fields])) AND (“therapy”[Subheading] OR “therapy”[All Fields] OR “treatment”[All Fields] OR “therapeutics”[MeSH Terms] OR “therapeutics”[All Fields]) OR (“surgery”[Subheading] OR “surgery”[All Fields] OR “surgical procedures, operative”[MeSH Terms] OR (“surgical”[All Fields] AND “procedures”[All Fields] AND “operative”[All Fields]) OR “operative surgical procedures”[All Fields] OR “surgery”[All Fields] OR “general surgery”[MeSH Terms] OR (“general”[All Fields] AND “surgery”[All Fields]) OR “general surgery”[All Fields]) OR (“endoscopy”[MeSH Terms] OR “endoscopy”[All Fields] OR “endoscopic”[All Fields])) AND (“clinical trials as topic”[MeSH Terms] OR (“clinical”[All Fields] AND “trials”[All Fields] AND “topic”[All Fields]) OR “clinical trials as topic”[All Fields] OR “trial”[All Fields]) OR (“random allocation”[MeSH Terms] OR (“random”[All Fields] AND “allocation”[All Fields]) OR “random allocation”[All Fields] OR “randomized”[All Fields]) OR (controlled[All Fields] AND (“clinical trials as topic”[MeSH Terms] OR (“clinical”[All Fields] AND “trials”[All Fields] AND “topic”[All Fields]) OR “clinical trials as topic”[All Fields] OR “trial”[All Fields])) OR (“clinical trial”[Publication Type] OR “clinical trials as topic”[MeSH Terms] OR “clinical trial”[All Fields]) OR study[All Fields]”. Thomson Reuters Endnote version X7® was used to remove the duplicate studies.

### **Eligibility criteria**

The eligibility criteria were either the comparative design between any type of endoscopic or surgical procedure for the management of gallstones and biliary duct calculi. In order to build the network of comparative studies, the various approaches were clustered into 4 arms: LC + LCBDE, LC + PostERCP, PreERCP + LC and LC + IntraERCP. It should be noted that, in the LC + LCBDE arm, some studies included only laparoscopic common bile duct exploration by means of choledochotomy while others also included the trans-cystic common bile duct exploration. No further divisions are made in this group because both approaches were frequently used in the same study. No additional major technical differences were found to justify more than three clusters for the ERCP procedures.

### **Study selection**

Two independent investigators (C.R. and R.C) carried out the study selection. Those articles which satisfied the eligibility criteria were evaluated in full text form in order to verify the presence of the inclusion criteria and the absence of the exclusion criteria. The inclusion criteria were : 1) comparison between at least two of the above-mentioned techniques; 2) randomized clinical design; 3) data reporting the success rate in all arms; 4) reporting at least one of the following outcomes in all arms: overall morbidity, overall mortality, acute pancreatitis, biliary leak, overall

bleeding, overall operative time, LOS or total cost. On the contrary, the following criteria were used to exclude studies: 1) letters to the editor, case reports, reviews, systematic reviews or meta-analyses, guidelines, prospective or retrospective non-randomized comparative studies and abstracts without a full text; 2) randomized studies including open cholecystectomies or laparotomic common bile duct exploration; 3) studies reporting unextractable data; 4) studies at risk for patient cohort duplication based on affiliation, author and year of publication and 5) language other than English. Therefore, if two studies were reported by the same institution (and/or authors), either the most recent study or the one of higher quality was included. Finally, a PRISMA flowchart was also formulated in order to demonstrate the transparency of the conclusions reached by the authors.

### **Data collection process and item**

Two independent reviewers (C.A.P and G.T.) carried out the data extraction using standardized data forms. All the data from each of the studies included was entered into a dedicated spreadsheet (Excel 2007, Microsoft Corporation®). The following data were extracted in order to describe the characteristics of each study: first author, affiliation and country, year of publication, type of patients enrolled, age, male/female ratio, study design, sample size of each arm and the outcomes of interest. The qualitative assessment of the studies was carried out on the basis of the Cochrane Collaboration tool for assessing the risk of bias in randomized trials. Any disagreement between the reviewers was resolved by discussion or consultation with the last author (F.M.).

### **Outcomes of Interest and Definitions**

The success of the procedure was defined as the clearance of the common bile duct according to the “intention-to-treat” analysis. Namely, the success rate was defined by the ratio between the patients who completed the assigned procedure without protocol violations (numerator) and all randomized patients in each arm (denominator). For the ERCP arms, overall mortality, overall morbidity, overall bleeding, overall operative time, LOS and total cost were included in the cumulative data of both the endoscopic and the surgical procedures. Acute pancreatitis and biliary leak were defined according to the protocol of each randomized study.

### **Statistical analysis**

Frequentist network meta-analysis was used to compare all the approaches available for treating gallstones and common biliary ductal calculi, generating a network for each outcome of interest<sup>1</sup>. The analysis was carried out according to the PRISMA extension statement incorporating Network Meta-Analyses of Health Care Interventions<sup>2</sup>. First, the meta-analytical results of all the pairwise (“head-to-head”) comparisons in each network were calculated in order to obtain two main type of estimations: 1) indirect estimates, deriving from the analysis in network format and indicating the meta-analytical results of the “head-to-head” comparisons which had never appeared in the literature; 2) mixed estimates, indicating the meta-analytical results of all the “head-to-head” comparisons already available in the literature, but implemented by their analysis in network format<sup>3</sup>. All indirect and mixed estimates were reported as odds ratios (ORs) or mean differences (MDs) for dichotomous outcomes and continuous variables, respectively. The ORs and MDs were expressed with 95% confidence intervals (CIs). An OR with CIs crossing 1 or an MD with CIs crossing 0 indicated that the two competitive approaches for the removal of ductal calculi were equivalent. It should be noted that, the network estimates (indirect and mixed) were reported in the forest plot<sup>4</sup>. Second, the network format permitted generating the “relative ranking probability” which represented the probability that each approach would be the best, the second, the third and the worst with a certain degree of uncertainty for each outcome of interest. Thus, using these values, the surface under the cumulative ranking (SUCRA) curves and mean ranks were obtained. In practice, the SUCRA value, expressed as a percentage, showed the probability, without uncertainty, that each approach would be the best option, based on the analyzed outcome represented<sup>5</sup>. Finally, the SUCRA values of the three outcomes of interest selected (two main indicators of safety, as well as overall morbidity and mortality, and one for efficacy as well as success rate) were used to calculate the safety/efficacy ratio<sup>4</sup>. Thus, in order to establish the best approach to the safety/efficacy ratio, two clustered ranking plots were created: overall morbidity/success rate and overall mortality/success rate. The robustness of the networks was assessed by evaluating the presence of inconsistency, heterogeneity and publication bias according to the PRISMA extension statement incorporating Network Meta-Analyses of Health Care Interventions<sup>1</sup>. The presence of inconsistency was evaluated using the “loop” approach<sup>6</sup>; when the ratio of two odds ratios (RoR) with CIs or the absolute difference between the direct and indirect estimations (IF) with CIs were close to 0 and 1 for dichotomous and continuous variables, respectively, inconsistency was absent. On

the other hand, the restricted maximum likelihood method was used to estimate heterogeneity. The extent of heterogeneity in each network was evaluated by comparing the magnitude of a common heterogeneity variance for the network ( $\tau$ ) with an empirical distribution of heterogeneity variances, considering the range of expected treatment estimates (ORs and MDs). A  $\tau$  value less than 0.1 indicated a very low level of heterogeneity while a  $\tau$  value from 0.1 to 0.5 indicated a reasonable level; a  $\tau$  value from 0.5 to 1.0 was considered a fairly high level and a  $\tau$  value greater than 1.0 represented very high heterogeneity<sup>7</sup>. When the  $\tau$  value was  $> 0.5$ , a multivariate meta-regression analysis was carried out in order to identify the reason for the heterogeneity in the outcome under study. Thus, the effects of all the covariates were reported using a beta ( $\beta$ ) coefficient and a P value. A two-sided P value  $<0.05$  indicated a significant impact of the covariate on the values of OR/MD for the outcome considered. Publication/reporting bias was reported using an adjusted funnel plot. Each funnel plot was tested using the Begg's test in order to identify whether the asymmetry was attributable to the small sample size effect. A two-sided P value  $<0.05$  indicated a significant small sample size effect<sup>8</sup>.

## Flow Diagram

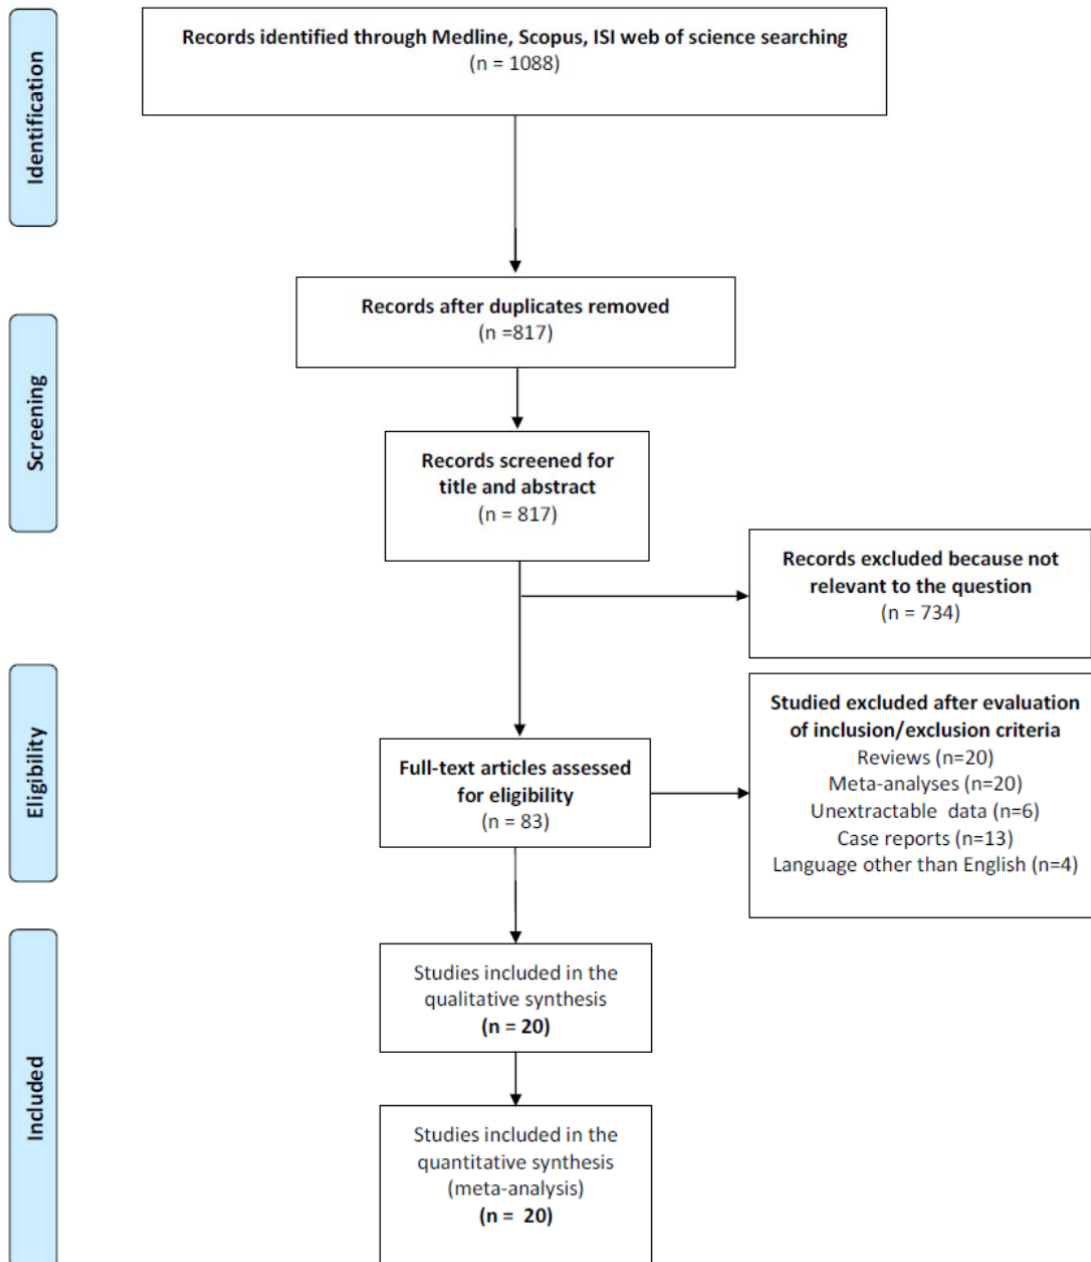

**eFigure 1.** PRISMA Flow Diagram.

**eTable 1.** Covariate potential source of heterogeneity in the studies included

| First Author                     | Study Design                    | Year | Country (W or E)         | Ductal Calculi | Age (MD, 95% CI) | Male (OR, 95% CI)   | Trans-cystic approach in LCBDE arm | Risk of bias |
|----------------------------------|---------------------------------|------|--------------------------|----------------|------------------|---------------------|------------------------------------|--------------|
| Rhodes et al. <sup>17</sup>      | LC + LCBDE vs. LC + PostERCP    | 1998 | UK (W)                   | Proven         | -6 (-12 to 1)    | 0.80 (0.31 to 2.03) | 28/40 (0.7)                        | Low/Unclear  |
| Cuschieri et al. <sup>18</sup>   | LC + LCBDE vs. PreERCP + LC     | 1999 | Europe and Australia (W) | Suspected      | NE               | NE                  | 45/133 (0.4)                       | Low/Unclear  |
| Sgourakis et al. <sup>19</sup>   | LC + LCBDE vs. PreERCP + LC     | 2002 | Greece (W)               | Suspected      | NE               | NE                  | NE                                 | High         |
| Nathanson et al. <sup>20</sup>   | LC + LCBDE vs. LC + PostERCP    | 2005 | Australia (W)            | Proven         | -4 (-12 to 4)    | 1.05 (0.44 to 2.52) | 0/57 (0)                           | Low/Unclear  |
| Hong et al. <sup>21</sup>        | LC + LCBDE vs. LC + IntraERCP   | 2006 | China (E)                | Proven         | NE               | NE                  | 0/141 (0)                          | Low/Unclear  |
| Lella et al. <sup>22</sup>       | PreERCP + LC vs. LC + IntraERCP | 2006 | Italy (W)                | Proven         | NE               | NE                  | NA                                 | Low/Unclear  |
| Morino et al. <sup>23</sup>      | PreERCP + LC vs. LC + IntraERCP | 2006 | Italy (W)                | Proven         | 6 (-1 to 12)     | 1.65 (0.75 to 3.88) | NA                                 | Low/Unclear  |
| Rabago et al. <sup>24</sup>      | PreERCP + LC vs. LC + IntraERCP | 2006 | Spain (W)                | Suspected      | NE               | NE                  | NA                                 | Low/Unclear  |
| Noble et al. <sup>25</sup>       | LC + LCBDE vs. PreERCP + LC     | 2009 | U.K. (W)                 | Proven         | 2 (1 to 3)*      | 1.54 (0.66 to 3.57) | 5/44 (0.1)                         | Low/Unclear  |
| Bansal et al. <sup>26</sup>      | LC + LCBDE vs. PreERCP + LC     | 2010 | India (E)                | Proven         | 8 (-1 to 16)     | 0.73 (0.15 to 3.49) | 0/15(0)                            | High         |
| Rogers et al. <sup>27</sup>      | LC + LCBDE vs. PreERCP + LC     | 2010 | US (W)                   | Suspected      | -5 (-6 to -4)*   | 1.01 (0.45 to 2.28) | 57/57 (1)                          | Low/Unclear  |
| ElGeide et al. <sup>28</sup>     | PreERCP + LC vs. LC + IntraERCP | 2011 | Egypt (W)                | Proven         | -3 (-5 to -1)*   | 1.19 (0.64 to 2.23) | NA                                 | Low/Unclear  |
| ElGeide et al. (§) <sup>29</sup> | LC + LCBDE vs. LC + IntraERCP   | 2011 | Egypt (W)                | Proven         | 4 (2 to 6)*      | 0.87 (0.48 to 1.57) | 57/115(0.5)                        | Low/Unclear  |

|                               |                                      |  |      |               |           |               |                     |             |             |
|-------------------------------|--------------------------------------|--|------|---------------|-----------|---------------|---------------------|-------------|-------------|
| Ferulano et al. <sup>30</sup> | LC + LCBDE vs .<br>PreERCP + LC      |  | 2011 | Italy (W)     | Suspected | NE            | NE                  | NE          | High        |
| Tzovars et al. <sup>31</sup>  | PreERCP + LC<br>vs. LC<br>+IntraERCP |  | 2012 | Greece (W)    | Proven    | 3 (-3 to 4)   | 1.04 (0.47 to 2.29) | NA          | Low/Unclear |
| Koc et al. <sup>32</sup>      | LC + LCBDE vs.<br>PreERCP + LC       |  | 2013 | Turkey (W)    | Proven    | -3 (-10 to 4) | 1.08 (0.49 to 2.37) | 0/57(0)     | Low/Unclear |
| Ding et al. <sup>33</sup>     | LC + LCBDE vs .<br>PreERCP + LC      |  | 2014 | China (E)     | Proven    | 0 (-2 to 2)   | 0.82 (0.48 to 1.39) | 0/110(0)    | Low/Unclear |
| Sahoo et al. <sup>34</sup>    | PreERCP + LC<br>vs. LC<br>+IntraERCP |  | 2014 | India (E)     | Proven    | NE            | NE                  | NA          | Low/Unclear |
| Lv et al. <sup>35</sup>       | LC + LCBDE vs.<br>PreERCP + LC       |  | 2016 | China (E)     | Proven    | -3 (-10 to 4) | 1.65 (0.43 to 4.17) | NE          | High        |
| Poh et al. <sup>36</sup>      | LC + LCBDE vs.<br>LC + IntraERCP     |  | 2016 | Australia (W) | Proven    | -1 (-9 to 7)  | 1.17 (0.54 to 2.55) | 29/52 (0.6) | Low/Unclear |

**Legend:** LC: Laparoscopic Cholecystectomy; LCDBE: Laparoscopic Common Bile Duct Exploration; PostERCP: Postoperative Endoscopic Retrograde Cholangiopancreatography; PreERCP: Preoperative Endoscopic Retrograde Cholangiopancreatography; IntraERCP: Intraoperative Endoscopic Retrograde Cholangiopancreatography; W: Western; E: Eastern; MD: Mean Difference; 95% CI= 95% confidence interval; OR: Odds ratio; NE: not extractable, NA= not applicable

**eFigure 2.** Quality assessment of the study based on the Cochrane Collaboration tool for assessing risk of bias in randomized trials.

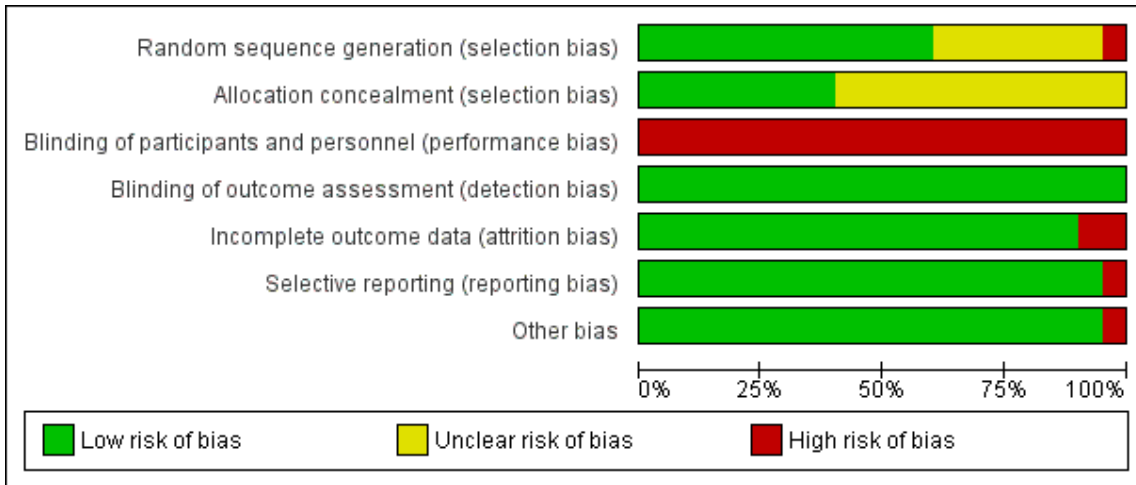



**eFigure 3 (Panels A-I).** Network geometry of all outcomes.

**Panel A.** Success rate

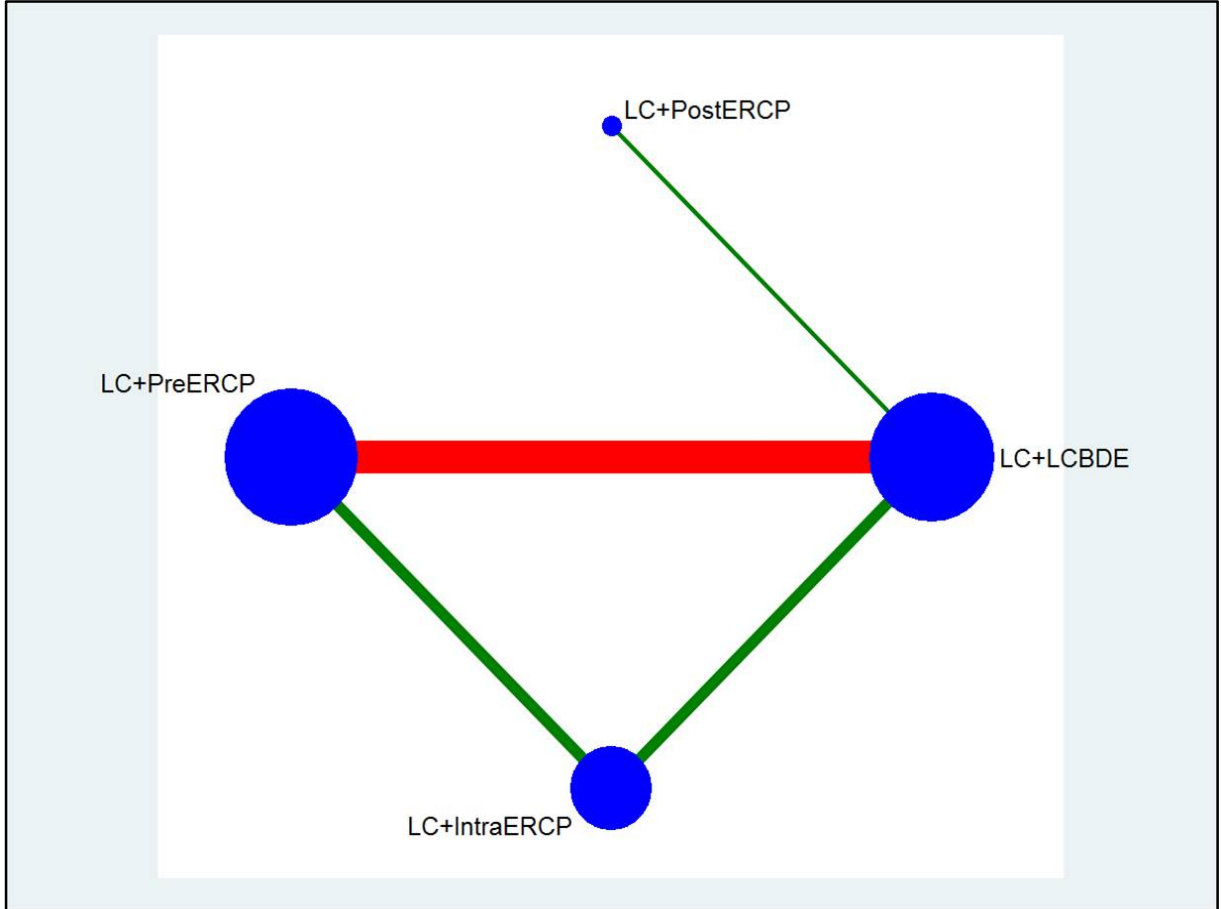

**Legend:** the blue nodes represent the interventions compared while the edges represent the direct comparisons available (comparisons evaluated in at least one study) between pairs of interventions. The node sizes are weighted based on the number of patients in each arm while the edges are weighted using inverse variance. The edge colors (green or red) are weighted based on the quality of the studies included. A green edge indicates the comparison with high quality studies while a red line indicates comparison with low quality studies. LC: Laparoscopic Cholecystectomy; LCDBE: Laparoscopic Common Bile Duct Exploration; PostERCP: Postoperative Endoscopic Retrograde Cholangiopancreatography; PreERCP: Preoperative Endoscopic Retrograde Cholangiopancreatography; IntraERCP: Intraoperative Endoscopic Retrograde Cholangiopancreatography.

**Panel B.** Overall mortality rate

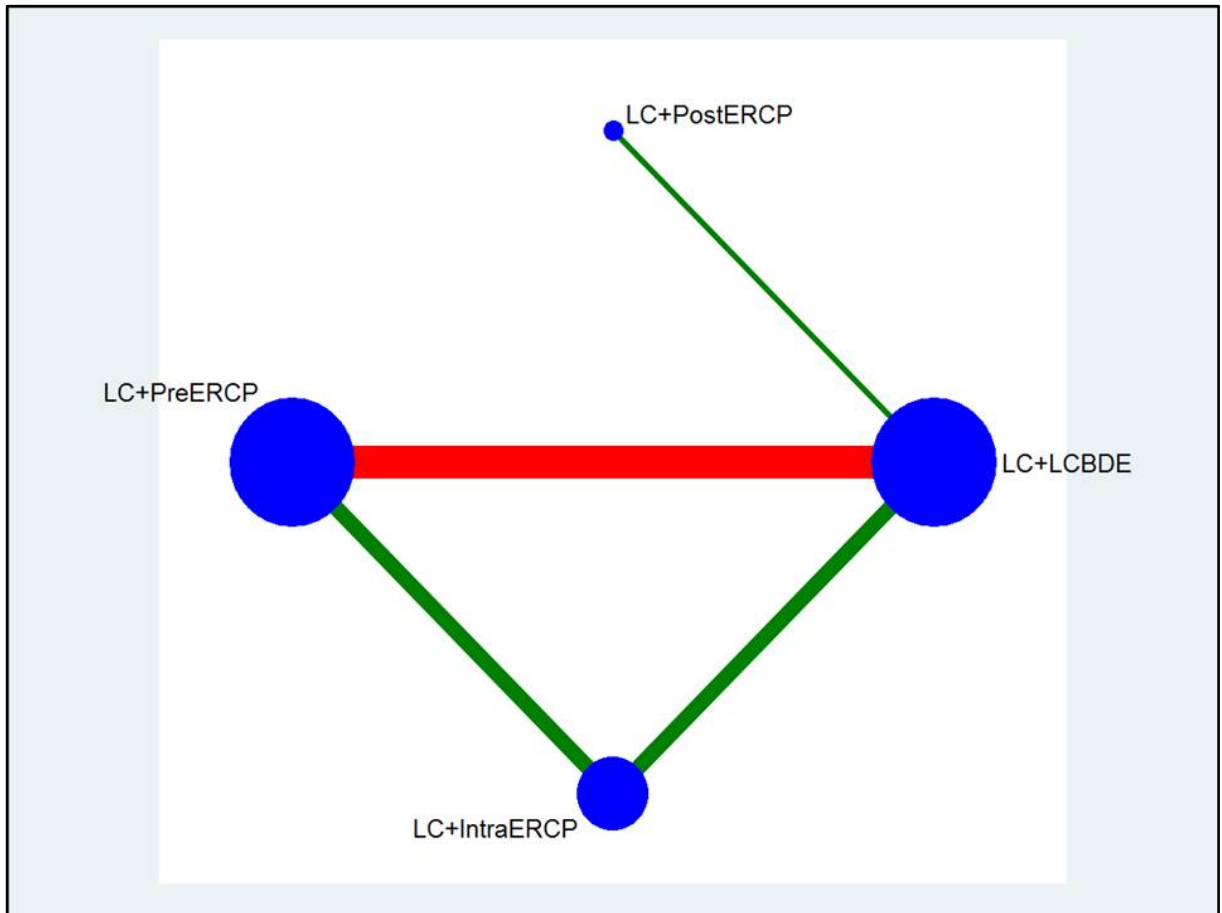

**Legend:** the blue nodes represent the interventions compared while the edges represent the direct comparisons available (comparisons evaluated in at least one study) between pairs of interventions. The node sizes are weighted based on the number of patients in each arm while the edges are weighted using inverse variance. The edge colors (green or red) are weighted based on the quality of the studies included. A green edge indicates the comparison with high quality studies while a red line indicates comparison with low quality studies. LC: Laparoscopic Cholecystectomy; LCDBE: Laparoscopic Common Bile Duct Exploration; PostERCP: Postoperative Endoscopic Retrograde Cholangiopancreatography; PreERCP: Preoperative Endoscopic Retrograde Cholangiopancreatography; IntraERCP: Intraoperative Endoscopic Retrograde Cholangiopancreatography.

Panel C. Overall morbidity rate

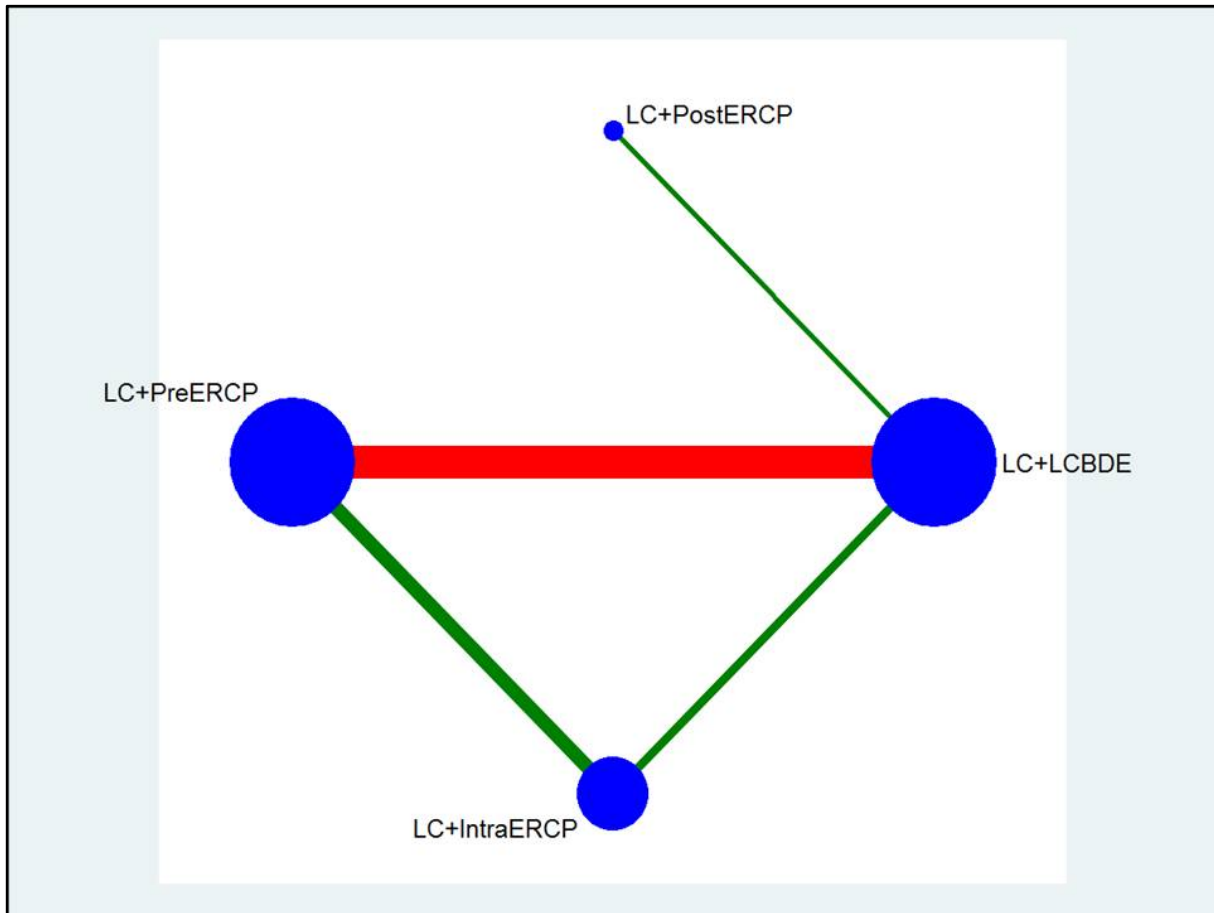

**Legend:** the blue nodes represent the interventions compared while the edges represent the direct comparisons available (comparisons evaluated in at least one study) between pairs of interventions. The node sizes are weighted based on the number of patients in each arm while the edges are weighted using inverse variance. The edge colors (green or red) are weighted based on the quality of the studies included. A green edge indicates the comparison with high quality studies while a red line indicates comparison with low quality studies. LC: Laparoscopic Cholecystectomy; LCDBE: Laparoscopic Common Bile Duct Exploration; PostERCP: Postoperative Endoscopic Retrograde Cholangiopancreatography; PreERCP: Preoperative Endoscopic Retrograde Cholangiopancreatography; IntraERCP: Intraoperative Endoscopic Retrograde Cholangiopancreatography.

**Panel D.** Acute pancreatitis

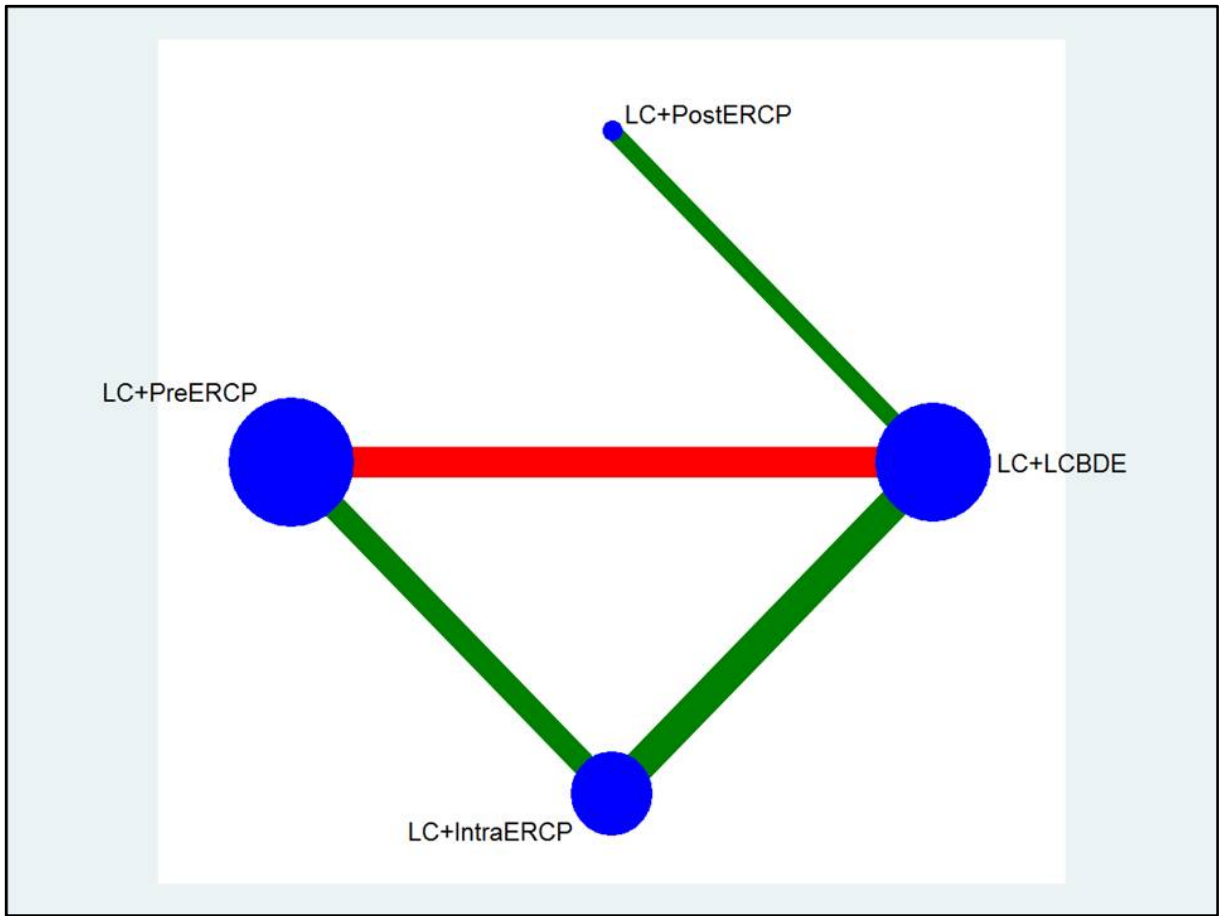

**Legend:** the blue nodes represent the interventions compared while the edges represent the direct comparisons available (comparisons evaluated in at least one study) between pairs of interventions. The node sizes are weighted based on the number of patients in each arm while the edges are weighted using inverse variance. The edge colors (green or red) are weighted based on the quality of the studies included. A green edge indicates the comparison with high quality studies while a red line indicates comparison with low quality studies. LC: Laparoscopic Cholecystectomy; LCDBE: Laparoscopic Common Bile Duct Exploration; PostERCP: Postoperative Endoscopic Retrograde Cholangiopancreatography; PreERCP: Preoperative Endoscopic Retrograde Cholangiopancreatography; IntraERCP: Intraoperative Endoscopic Retrograde Cholangiopancreatography.

**Panel E.** Biliary leak

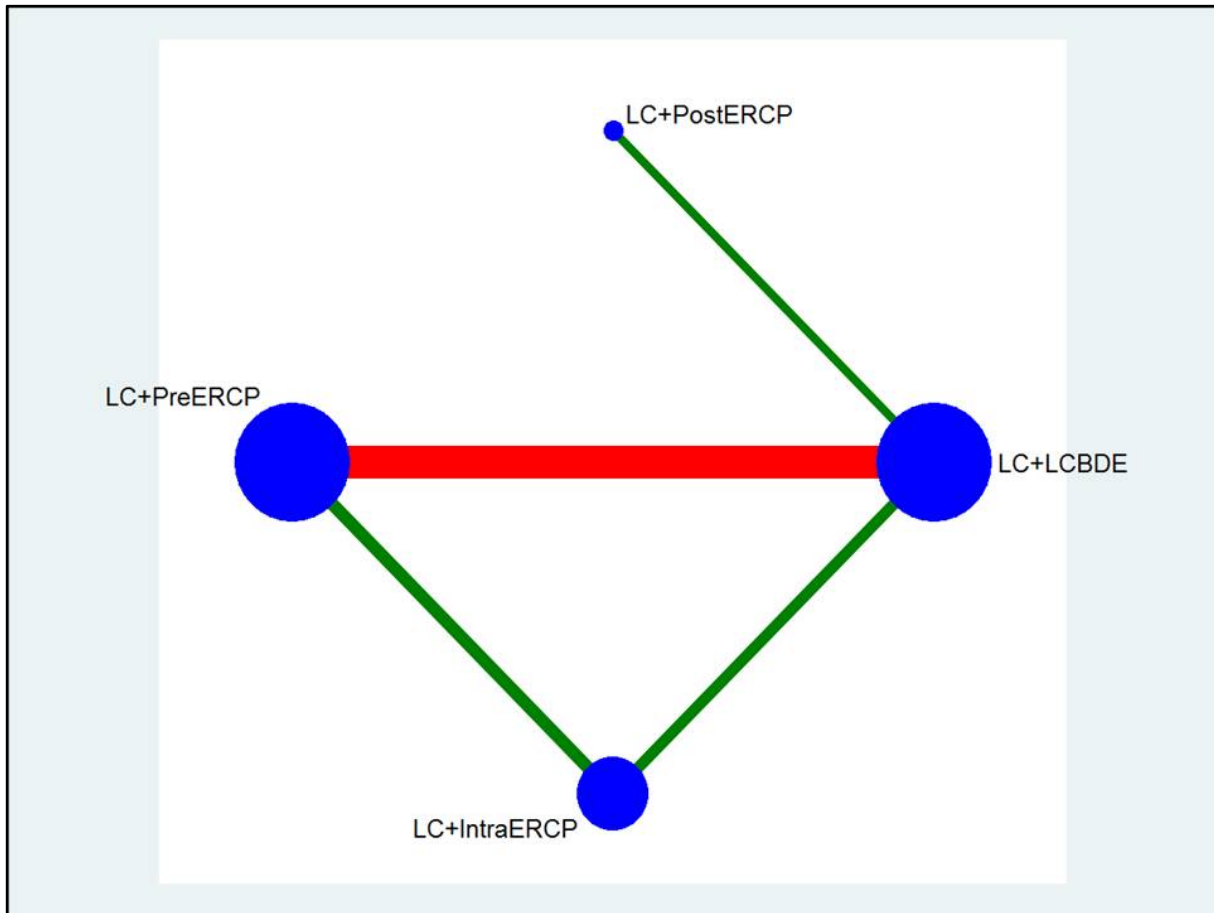

**Legend:** the blue nodes represent the interventions compared while the edges represent the direct comparisons available (comparisons evaluated in at least one study) between pairs of interventions. The node sizes are weighted based on the number of patients in each arm while the edges are weighted using inverse variance. The edge colors (green or red) are weighted based on the quality of the studies included. A green edge indicates the comparison with high quality studies while a red line indicates comparison with low quality studies. LC: Laparoscopic Cholecystectomy; LCDBE: Laparoscopic Common Bile Duct Exploration; PostERCP: Postoperative Endoscopic Retrograde Cholangiopancreatography; PreERCP: Preoperative Endoscopic Retrograde Cholangiopancreatography; IntraERCP: Intraoperative Endoscopic Retrograde Cholangiopancreatography.

**Panel F.** Overall bleeding

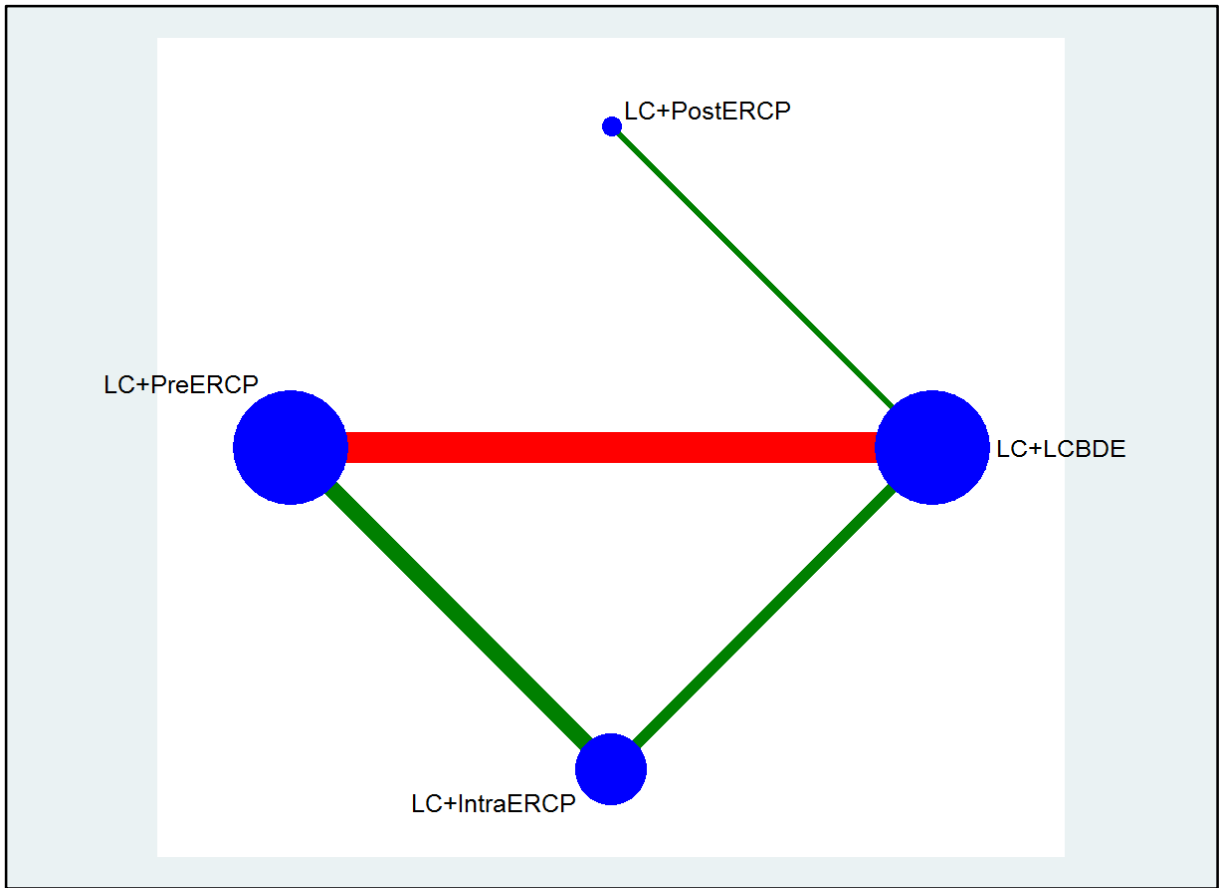

**Legend:** the blue nodes represent the interventions compared while the edges represent the direct comparisons available (comparisons evaluated in at least one study) between pairs of interventions. The node sizes are weighted based on the number of patients in each arm while the edges are weighted using inverse variance. The edge colors (green or red) are weighted based on the quality of the studies included. A green edge indicates the comparison with high quality studies while a red line indicates comparison with low quality studies. LC: Laparoscopic Cholecystectomy; LCDBE: Laparoscopic Common Bile Duct Exploration; PostERCP: Postoperative Endoscopic Retrograde Cholangiopancreatography; PreERCP: Preoperative Endoscopic Retrograde Cholangiopancreatography; IntraERCP: Intraoperative Endoscopic Retrograde Cholangiopancreatography.

**Panel G.** Overall operative time

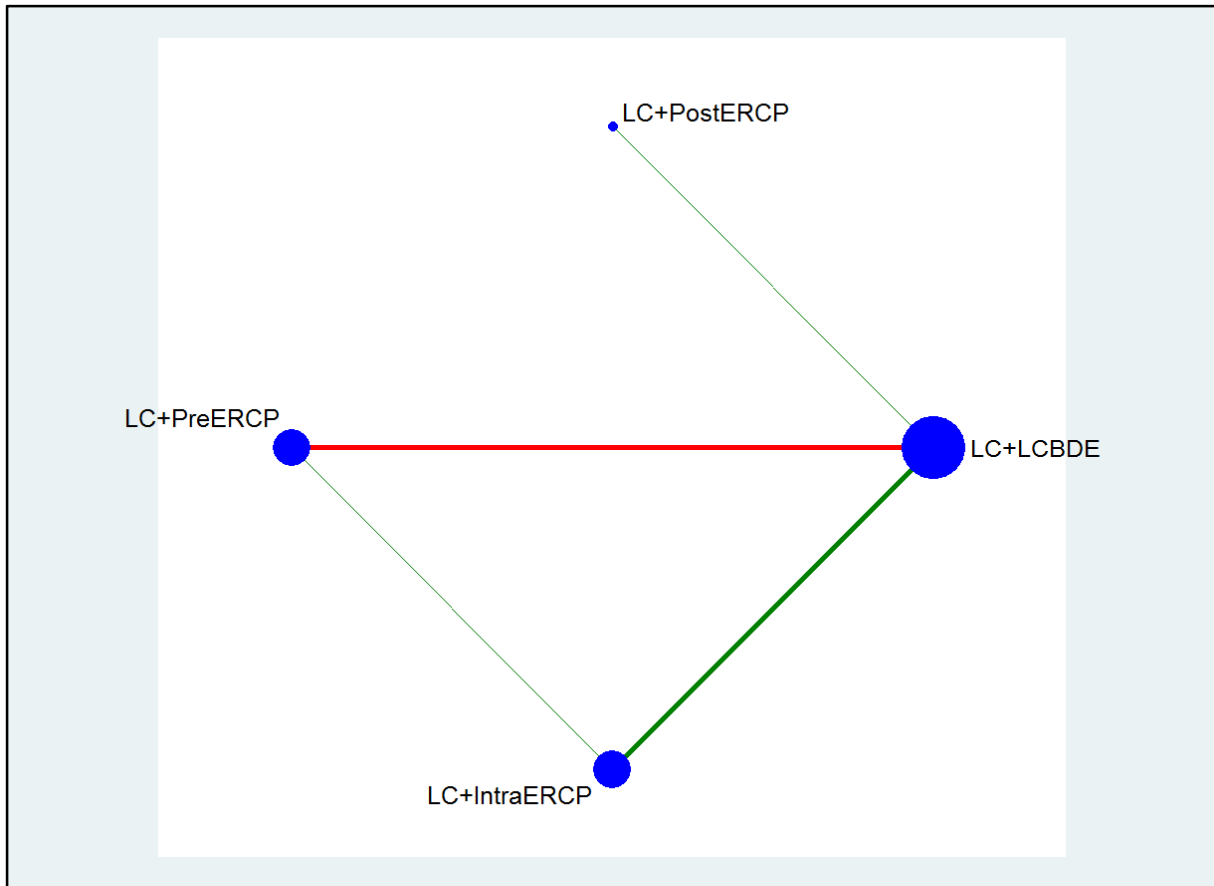

**Legend:** the blue nodes represent the interventions compared while the edges represent the direct comparisons available (comparisons evaluated in at least one study) between pairs of interventions. The node sizes are weighted based on the number of patients in each arm while the edges are weighted using inverse variance. The edge colors (green or red) are weighted based on the quality of the studies included. A green edge indicates the comparison with high quality studies while a red line indicates comparison with low quality studies. LC: Laparoscopic Cholecystectomy; LCDBE: Laparoscopic Common Bile Duct Exploration; PostERCP: Postoperative Endoscopic Retrograde Cholangiopancreatography; PreERCP: Preoperative Endoscopic Retrograde Cholangiopancreatography; IntraERCP: Intraoperative Endoscopic Retrograde Cholangiopancreatography.

Panel H. Length of hospital stay

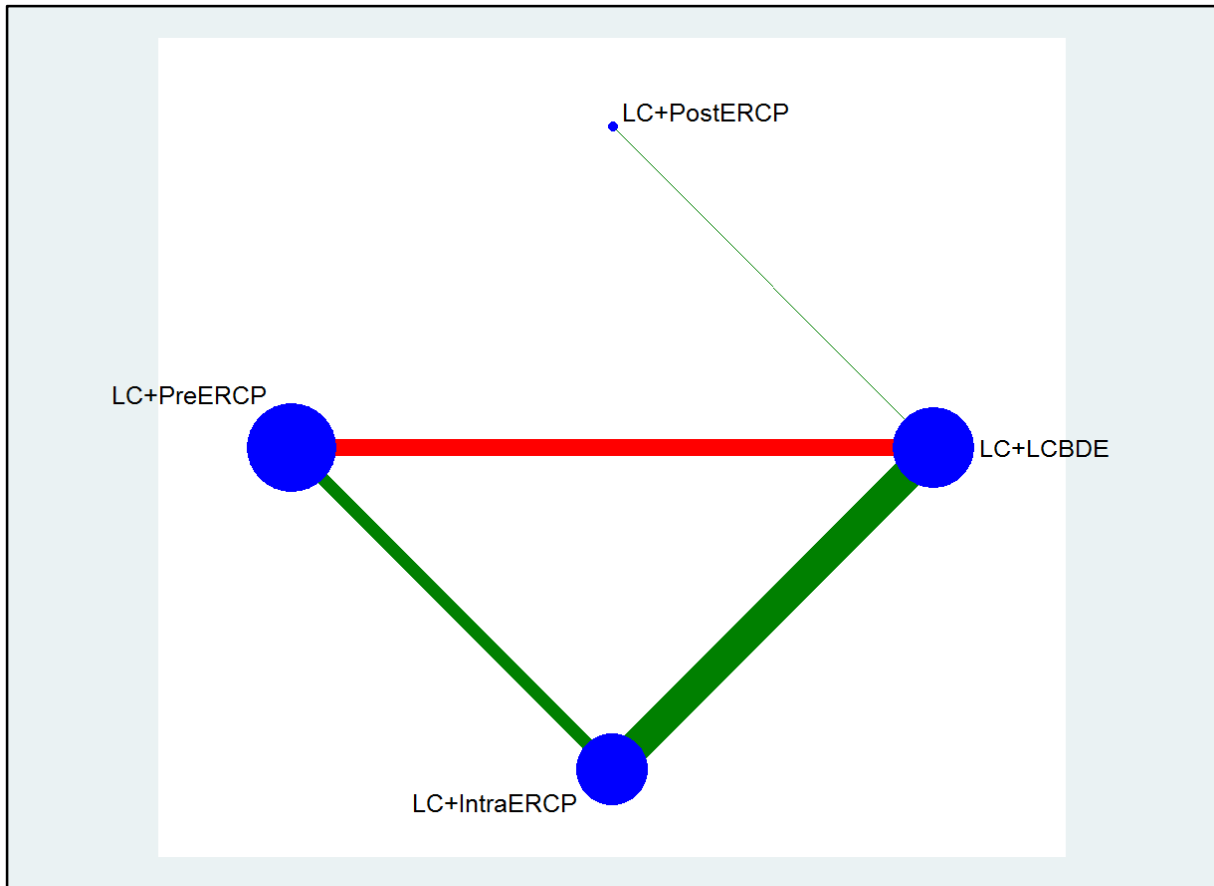

**Legend:** the blue nodes represent the interventions compared while the edges represent the direct comparisons available (comparisons evaluated in at least one study) between pairs of interventions. The node sizes are weighted based on the number of patients in each arm while the edges are weighted using inverse variance. The edge colors (green or red) are weighted based on the quality of the studies included. A green edge indicates the comparison with high quality studies while a red line indicates comparison with low quality studies. LC: Laparoscopic Cholecystectomy; LCDBE: Laparoscopic Common Bile Duct Exploration; PostERCP: Postoperative Endoscopic Retrograde Cholangiopancreatography; PreERCP: Preoperative Endoscopic Retrograde Cholangiopancreatography; IntraERCP: Intraoperative Endoscopic Retrograde Cholangiopancreatography.



**Panel I. Total cost**

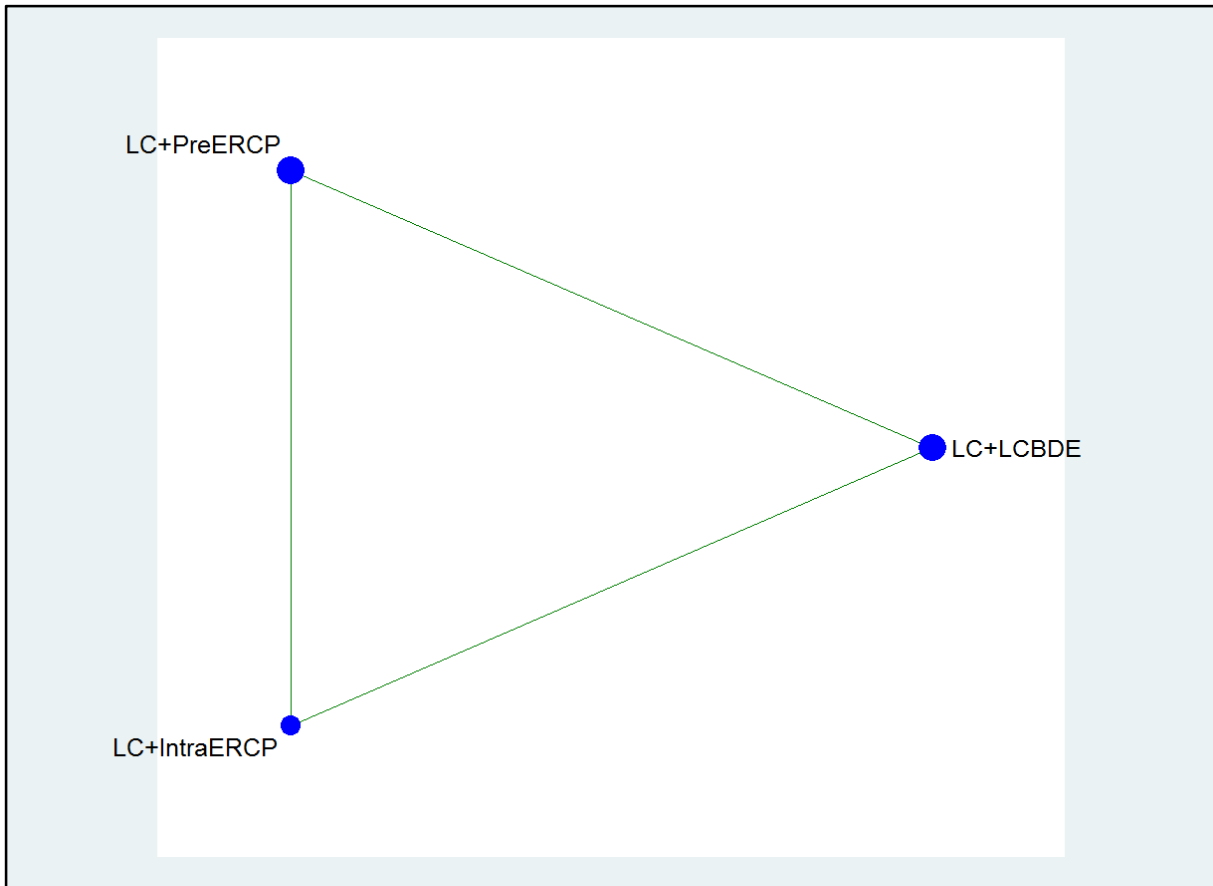

**Legend:** the blue nodes represent the interventions compared while the edges represent the direct comparisons available (comparisons evaluated in at least one study) between pairs of interventions. The node sizes are weighted based on the number of patients in each arm while the edges are weighted using inverse variance. The edge colors (green or red) are weighted based on the quality of the studies included. A green edge indicates the comparison with high quality studies while a red line indicates comparison with low quality studies. LC: Laparoscopic Cholecystectomy; LCDBE: Laparoscopic Common Bile Duct Exploration; PostERCP: Postoperative Endoscopic Retrograde Cholangiopancreatography; PreERCP: Preoperative Endoscopic Retrograde Cholangiopancreatography; IntraERCP: Intraoperative Endoscopic Retrograde Cholangiopancreatography.

**eFigure 4 (Panels A-I).** Contribution plots of all outcomes.

**Panel A.** Success rate

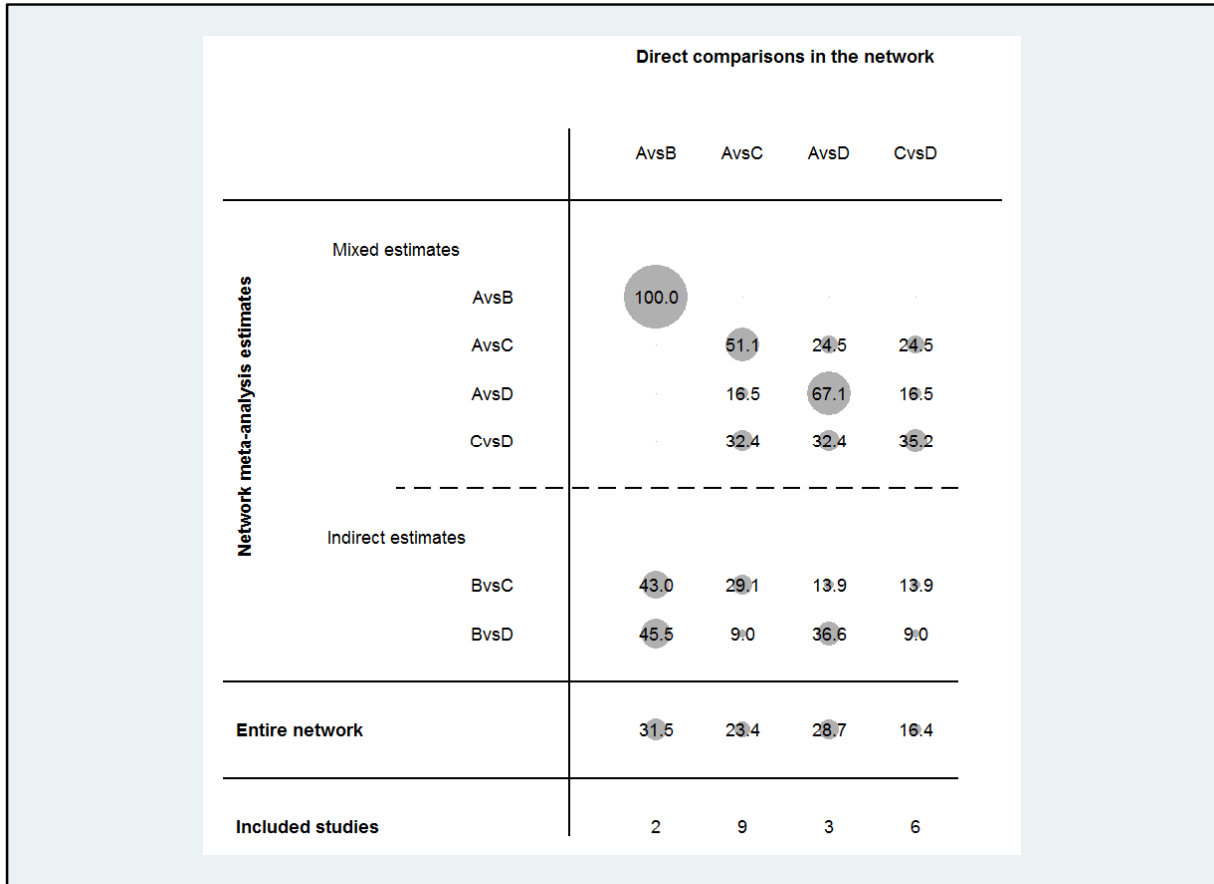

**Legend:** All available direct comparisons (comparisons evaluated in at least one study) are reported in the columns while the following are reported in the rows: 1) the mixed comparisons (namely the estimates already available in the literature but implemented by network) and 2) the indirect comparisons (namely the comparisons not available in the literature but generated by the network). The table should be read from left to right; each row contains the contribution of each direct comparison in the network (mixed and indirect) estimates and, thus, the cumulative sum of the contributions is 100 (in percentages). In the plots, the contribution of each direct comparison in building the entire network are also reported; arm A= Laparoscopic Cholecystectomy (LC) plus Laparoscopic Common Bile Duct Exploration (LCDBE); Arm B= LC plus Postoperative Endoscopic Retrograde Cholangiopancreatography (PostERCP); arm C= LC plus Preoperative Endoscopic Retrograde Cholangiopancreatography (PreERCP); arm D= LC plus Intraoperative Endoscopic Retrograde Cholangiopancreatography (IntraERCP).

**Panel B.** Overall mortality rate

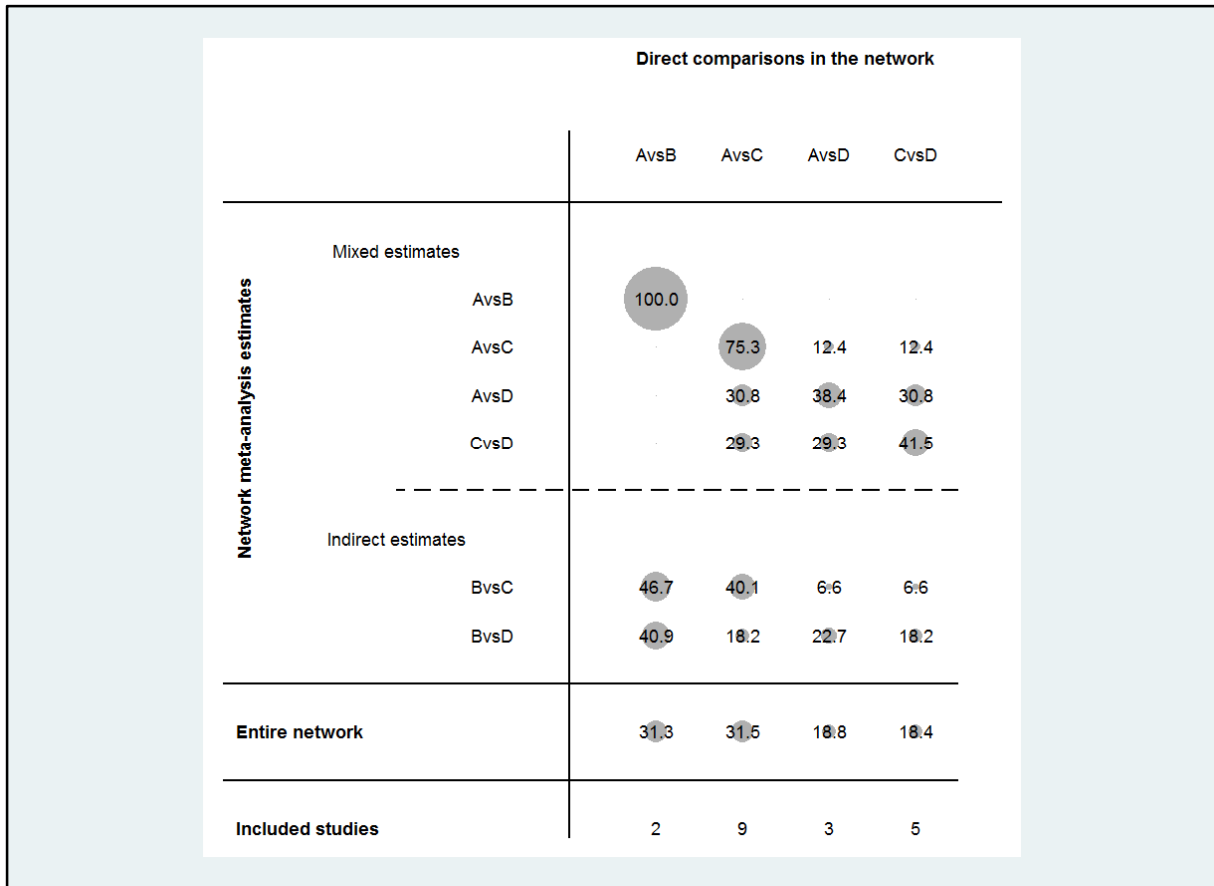

**Legend:** All available direct comparisons (comparisons evaluated in at least one study) are reported in the columns while the following are reported in the rows: 1) the mixed comparisons (namely the estimates already available in the literature but implemented by network) and 2) the indirect comparisons (namely the comparisons not available in the literature but generated by the network). The table should be read from left to right; each row contains the contribution of each direct comparison in the network (mixed and indirect) estimates and, thus, the cumulative sum of the contributions is 100 (in percentages). In the plots, the contribution of each direct comparison in building the entire network are also reported; arm A= Laparoscopic Cholecystectomy (LC) plus Laparoscopic Common Bile Duct Exploration (LCDBE); Arm B= LC plus Postoperative Endoscopic Retrograde Cholangiopancreatography (PostERCP); arm C= LC plus Preoperative Endoscopic Retrograde Cholangiopancreatography (PreERCP); arm D= LC plus Intraoperative Endoscopic Retrograde Cholangiopancreatography (IntraERCP).

**Panel C.** Overall morbidity rate

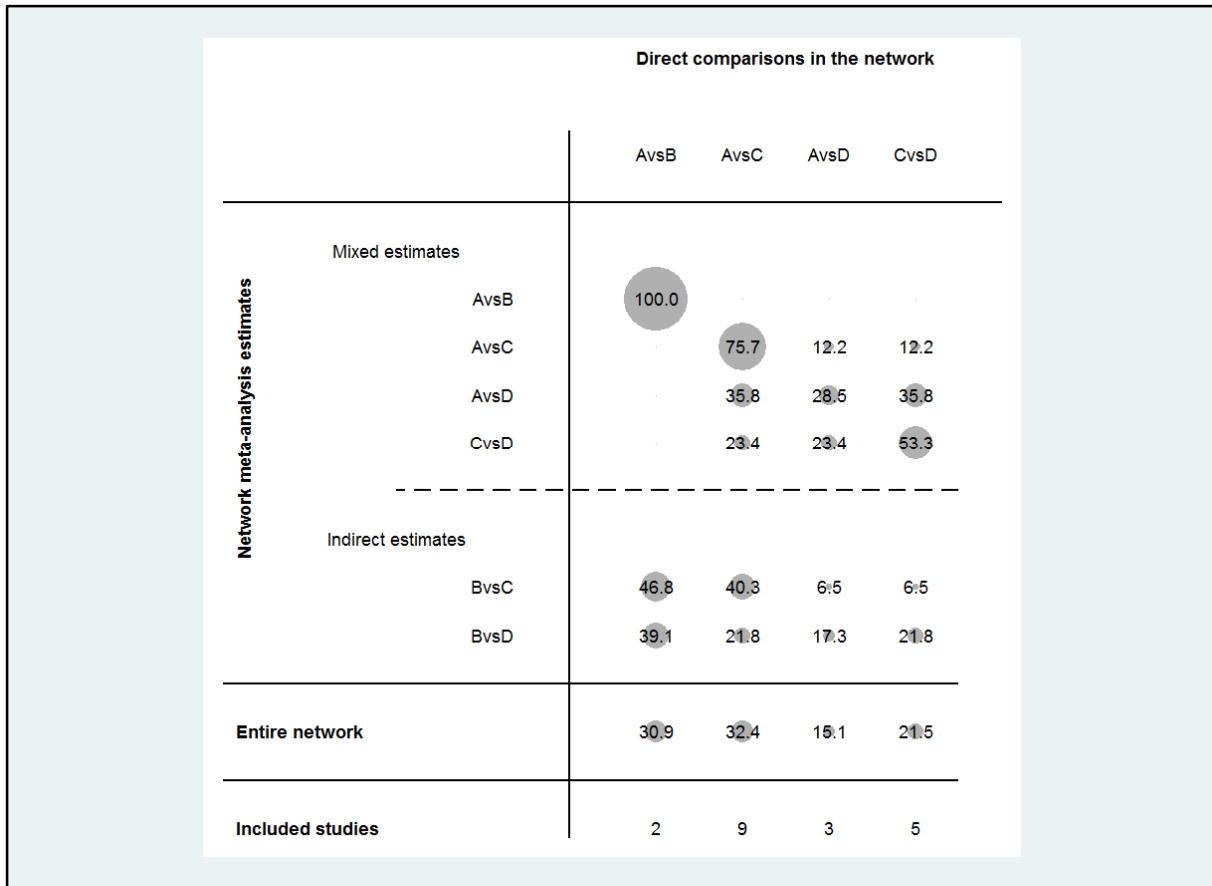

**Legend:** All available direct comparisons (comparisons evaluated in at least one study) are reported in the columns while the following are reported in the rows: 1) the mixed comparisons (namely the estimates already available in the literature but implemented by network) and 2) the indirect comparisons (namely the comparisons not available in the literature but generated by the network). The table should be read from left to right; each row contains the contribution of each direct comparison in the network (mixed and indirect) estimates and, thus, the cumulative sum of the contributions is 100 (in percentages). In the plots, the contribution of each direct comparison in building the entire network are also reported; arm A= Laparoscopic Cholecystectomy (LC) plus Laparoscopic Common Bile Duct Exploration (LCDBE); Arm B= LC plus Postoperative Endoscopic Retrograde Cholangiopancreatography (PostERCP); arm C= LC plus Preoperative Endoscopic Retrograde Cholangiopancreatography (PreERCP); arm D= LC plus Intraoperative Endoscopic Retrograde Cholangiopancreatography (IntraERCP).

**Panel D. Acute pancreatitis**

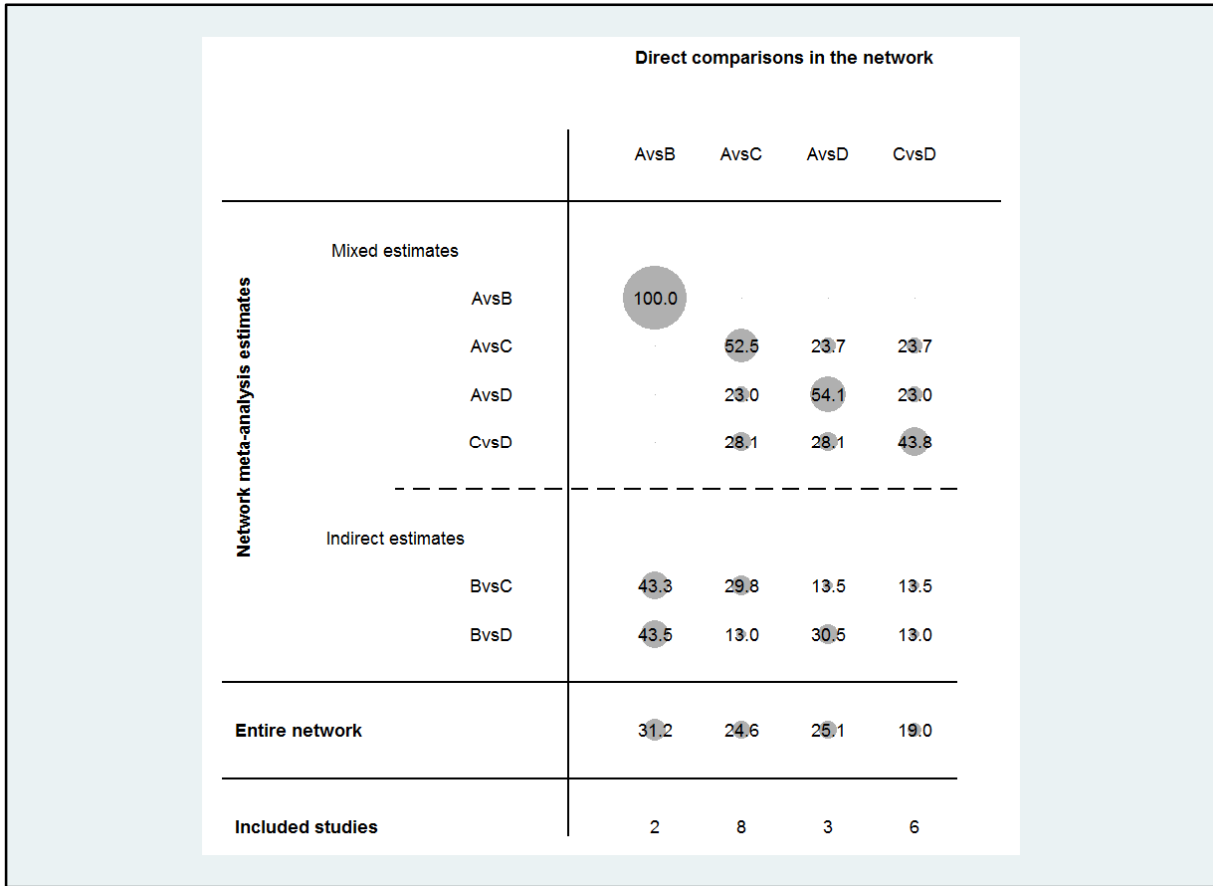

**Legend:** All available direct comparisons (comparisons evaluated in at least one study) are reported in the columns while the following are reported in the rows: 1) the mixed comparisons (namely the estimates already available in the literature but implemented by network) and 2) the indirect comparisons (namely the comparisons not available in the literature but generated by the network). The table should be read from left to right; each row contains the contribution of each direct comparison in the network (mixed and indirect) estimates and, thus, the cumulative sum of the contributions is 100 (in percentages). In the plots, the contribution of each direct comparison in building the entire network are also reported; arm A= Laparoscopic Cholecystectomy (LC) plus Laparoscopic Common Bile Duct Exploration (LCDBE); Arm B= LC plus Postoperative Endoscopic Retrograde Cholangiopancreatography (PostERCP); arm C= LC plus Preoperative Endoscopic Retrograde Cholangiopancreatography (PreERCP); arm D= LC plus Intraoperative Endoscopic Retrograde Cholangiopancreatography (IntraERCP).

**Panel E.** Biliary leak

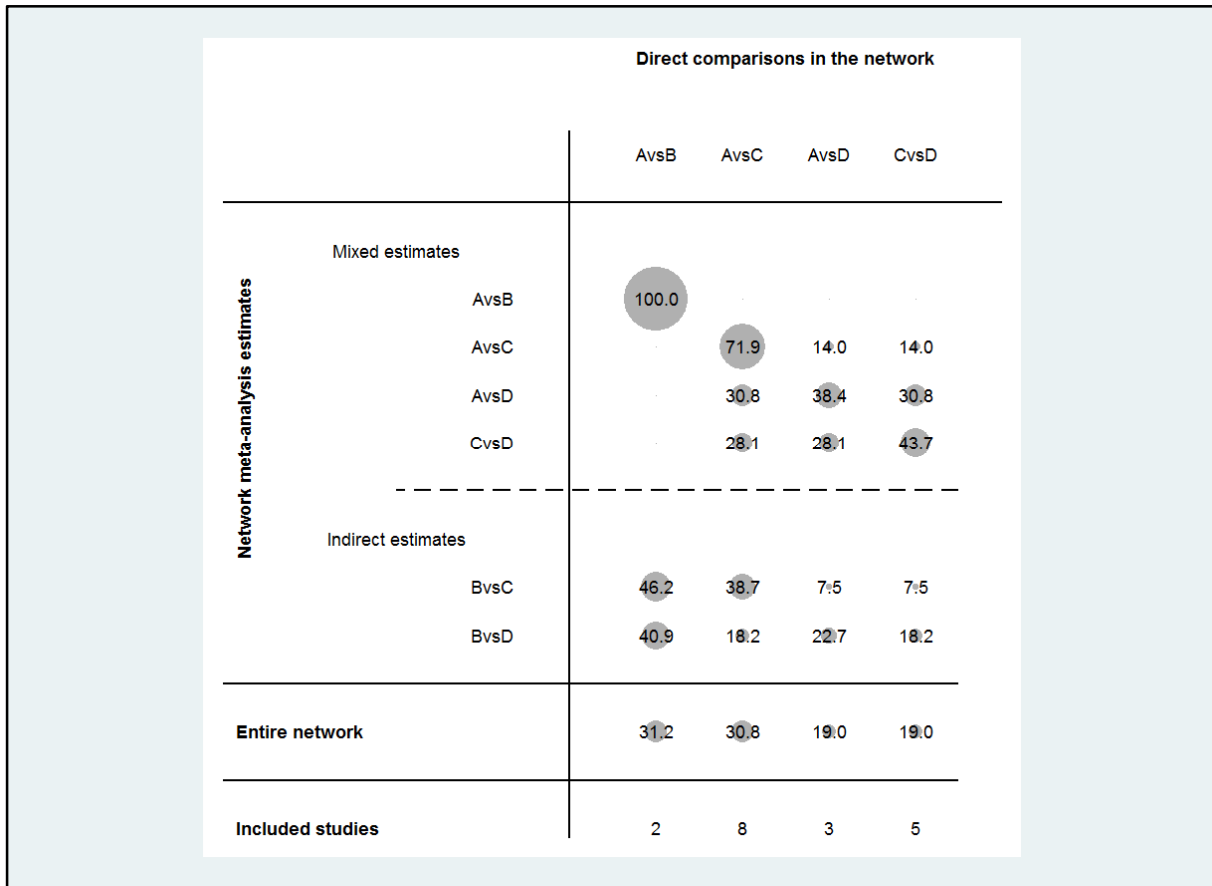

**Legend:** All available direct comparisons (comparisons evaluated in at least one study) are reported in the columns while the following are reported in the rows: 1) the mixed comparisons (namely the estimates already available in the literature but implemented by network) and 2) the indirect comparisons (namely the comparisons not available in the literature but generated by the network). The table should be read from left to right; each row contains the contribution of each direct comparison in the network (mixed and indirect) estimates and, thus, the cumulative sum of the contributions is 100 (in percentages). In the plots, the contribution of each direct comparison in building the entire network are also reported; arm A= Laparoscopic Cholecystectomy (LC) plus Laparoscopic Common Bile Duct Exploration (LCDBE); Arm B= LC plus Postoperative Endoscopic Retrograde Cholangiopancreatography (PostERCP); arm C= LC plus Preoperative Endoscopic Retrograde Cholangiopancreatography (PreERCP); arm D= LC plus Intraoperative Endoscopic Retrograde Cholangiopancreatography (IntraERCP).

**Panel F.** Overall bleeding

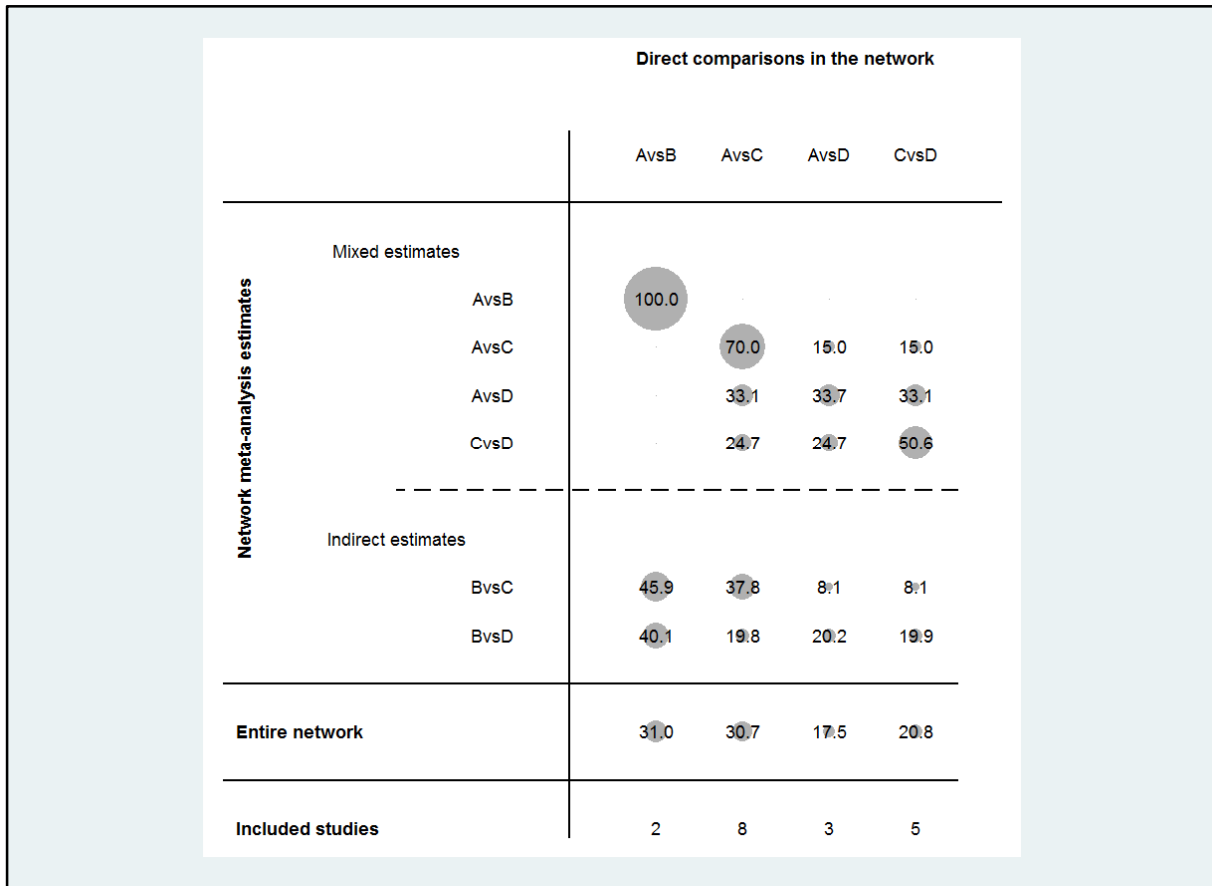

**Legend:** All available direct comparisons (comparisons evaluated in at least one study) are reported in the columns while the following are reported in the rows: 1) the mixed comparisons (namely the estimates already available in the literature but implemented by network) and 2) the indirect comparisons (namely the comparisons not available in the literature but generated by the network). The table should be read from left to right; each row contains the contribution of each direct comparison in the network (mixed and indirect) estimates and, thus, the cumulative sum of the contributions is 100 (in percentages). In the plots, the contribution of each direct comparison in building the entire network are also reported; arm A= Laparoscopic Cholecystectomy (LC) plus Laparoscopic Common Bile Duct Exploration (LCDBE); Arm B= LC plus Postoperative Endoscopic Retrograde Cholangiopancreatography (PostERCP); arm C= LC plus Preoperative Endoscopic Retrograde Cholangiopancreatography (PreERCP); arm D= LC plus Intraoperative Endoscopic Retrograde Cholangiopancreatography (IntraERCP).

**Panel G.** Overall operative time

|                                        |                    | Direct comparisons in the network |             |             |             |      |
|----------------------------------------|--------------------|-----------------------------------|-------------|-------------|-------------|------|
|                                        |                    | AvsB                              | AvsC        | AvsD        | CvsD        |      |
| <b>Network meta-analysis estimates</b> | Mixed estimates    |                                   |             |             |             |      |
|                                        |                    | AvsB                              | 96.0        | 1.4         | 2.2         | 0.4  |
|                                        |                    | AvsC                              | 0.1         | 30.2        | 34.8        | 34.9 |
|                                        |                    | AvsD                              | 0.1         | 23.2        | 53.5        | 23.2 |
|                                        |                    | CvsD                              |             | 13.9        | 13.9        | 72.1 |
|                                        | -----              |                                   |             |             |             |      |
|                                        | Indirect estimates |                                   |             |             |             |      |
|                                        |                    | BvsC                              | 39.2        | 18.3        | 20.9        | 21.6 |
|                                        | BvsD               | 43.1                              | 12.9        | 30.2        | 13.7        |      |
| <b>Entire network</b>                  |                    | <b>29.8</b>                       | <b>17.3</b> | <b>26.9</b> | <b>26.0</b> |      |
| <b>Included studies</b>                |                    | <b>1</b>                          | <b>3</b>    | <b>3</b>    | <b>1</b>    |      |

**Legend:** All available direct comparisons (comparisons evaluated in at least one study) are reported in the columns while the following are reported in the rows: 1) the mixed comparisons (namely the estimates already available in the literature but implemented by network) and 2) the indirect comparisons (namely the comparisons not available in the literature but generated by the network). The table should be read from left to right; each row contains the contribution of each direct comparison in the network (mixed and indirect) estimates and, thus, the cumulative sum of the contributions is 100 (in percentages). In the plots, the contribution of each direct comparison in building the entire network are also reported; arm A= Laparoscopic Cholecystectomy (LC) plus Laparoscopic Common Bile Duct Exploration (LCDBE); Arm B= LC plus Postoperative Endoscopic Retrograde Cholangiopancreatography (PostERCP); arm C= LC plus Preoperative Endoscopic Retrograde Cholangiopancreatography (PreERCP); arm D= LC plus Intraoperative Endoscopic Retrograde Cholangiopancreatography (IntraERCP).



**Panel H.** Length of hospital stay

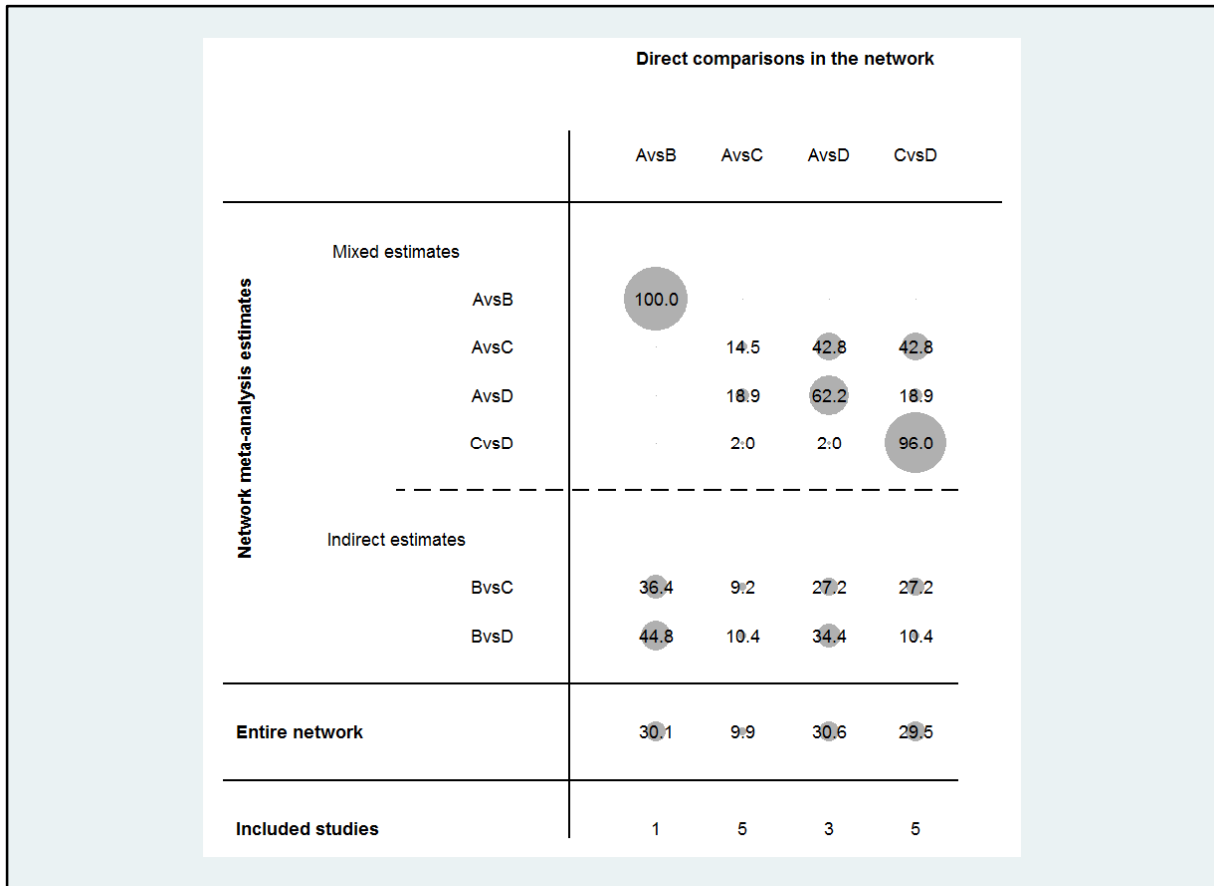

**Legend:** All available direct comparisons (comparisons evaluated in at least one study) are reported in the columns while the following are reported in the rows: 1) the mixed comparisons (namely the estimates already available in the literature but implemented by network) and 2) the indirect comparisons (namely the comparisons not available in the literature but generated by the network). The table should be read from left to right; each row contains the contribution of each direct comparison in the network (mixed and indirect) estimates and, thus, the cumulative sum of the contributions is 100 (in percentages). In the plots, the contribution of each direct comparison in building the entire network are also reported; arm A= Laparoscopic Cholecystectomy (LC) plus Laparoscopic Common Bile Duct Exploration (LCDBE); Arm B= LC plus Postoperative Endoscopic Retrograde Cholangiopancreatography (PostERCP); arm C= LC plus Preoperative Endoscopic Retrograde Cholangiopancreatography (PreERCP); arm D= LC plus Intraoperative Endoscopic Retrograde Cholangiopancreatography (IntraERCP).

**Panel I. Total cost**

|                                 |                    | Direct comparisons in the network |             |             |
|---------------------------------|--------------------|-----------------------------------|-------------|-------------|
|                                 |                    | AvsC                              | AvsD        | CvsD        |
| Network meta-analysis estimates | Mixed estimates    |                                   |             |             |
|                                 | AvsC               | 71.5                              | 14.3        | 14.3        |
|                                 | AvsD               | 11.6                              | 76.7        | 11.6        |
|                                 | CvsD               | 41.3                              | 41.3        | 17.5        |
|                                 | -----              |                                   |             |             |
|                                 | Indirect estimates |                                   |             |             |
| <b>Entire network</b>           |                    | <b>41.7</b>                       | <b>43.4</b> | <b>14.9</b> |
| <b>Included studies</b>         |                    | <b>2</b>                          | <b>1</b>    | <b>1</b>    |

**Legend:** All available direct comparisons (comparisons evaluated in at least one study) are reported in the columns while the following are reported in the rows: 1) the mixed comparisons (namely the estimates already available in the literature but implemented by network) and 2) the indirect comparisons (namely the comparisons not available in the literature but generated by the network). The table should be read from left to right; each row contains the contribution of each direct comparison in the network (mixed and indirect) estimates and, thus, the cumulative sum of the contributions is 100 (in percentages). In the plots, the contribution of each direct comparison in building the entire network are also reported; arm A= Laparoscopic Cholecystectomy (LC) plus Laparoscopic Common Bile Duct Exploration (LCDBE); Arm B= LC plus Postoperative Endoscopic Retrograde Cholangiopancreatography (PostERCP); arm C= LC plus Preoperative Endoscopic Retrograde Cholangiopancreatography (PreERCP); arm D= LC plus Intraoperative Endoscopic Retrograde Cholangiopancreatography (IntraERCP).

**eFigure 5 (Panels A-I).** Forest plots of all outcomes

**Panel A.** Success rate

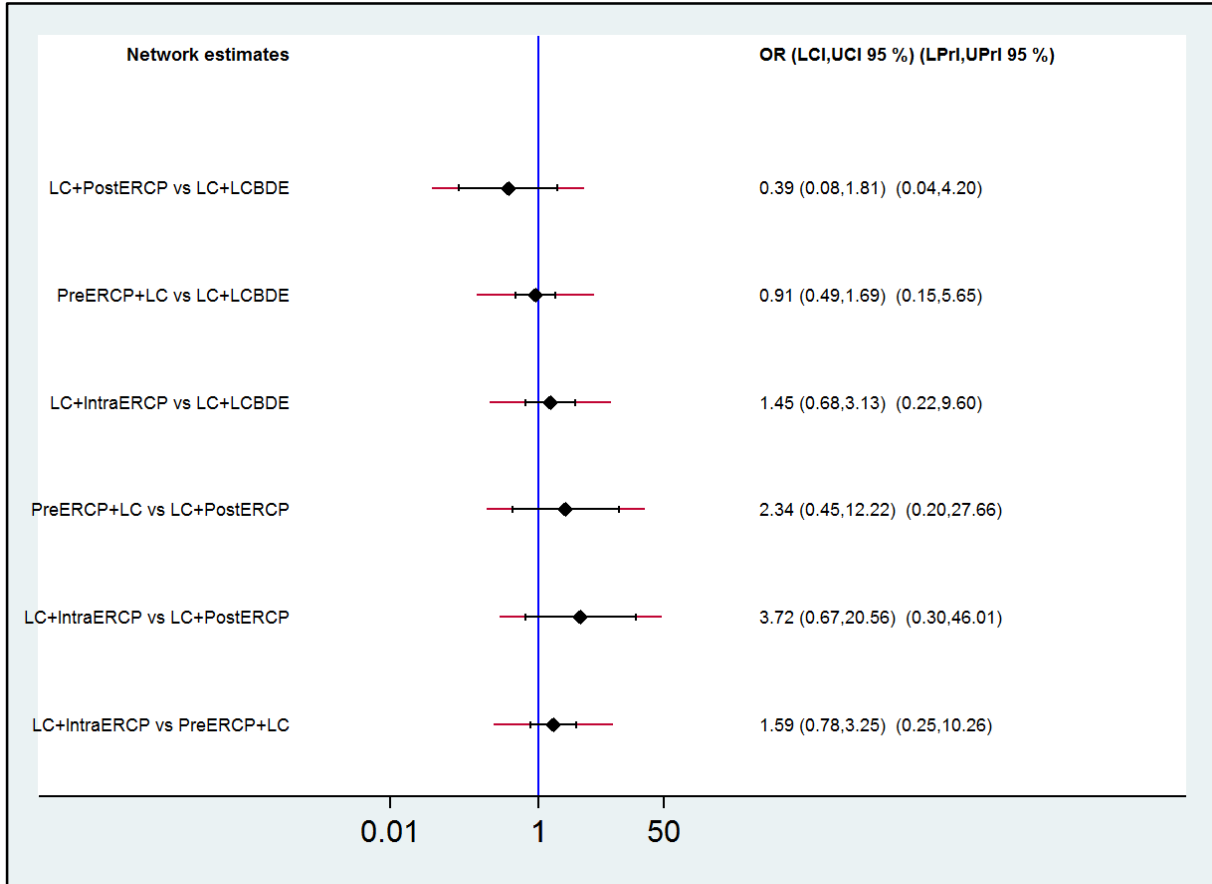

**Legend:** The results are reported as Odds ratios (ORs) and 95% confidence intervals (CIs). The blue line (line of null effect) is equal to 1. The solid black lines represent the CIs while the diamond summarizes the ORs. For each pairwise comparison, the forest plot should be read as following: if the diamond with the entire CI did not reach the blue line of null effect, there is a significant difference. If the entire CI is on the left of the null effect, the event is significantly higher in the “intervention arm” while, when the entire CI is on the right, the event is statistically more frequent in the “reference arm”. When the entire CI crosses the line of null effect, the difference between the two procedures compared is not statistically significant. In addition, a red line reports the Predictive Interval (Pri), namely the interval within which the estimate of a future study is expected to be. Legend: LC: Laparoscopic Cholecystectomy; LCDBE: Laparoscopic Common Bile Duct Exploration; PostERCP: Postoperative Endoscopic Retrograde Cholangiopancreatography; PreERCP: Preoperative Endoscopic Retrograde Cholangiopancreatography; IntraERCP: Intraoperative Endoscopic Retrograde Cholangiopancreatography.

**Panel B.** Overall mortality rate

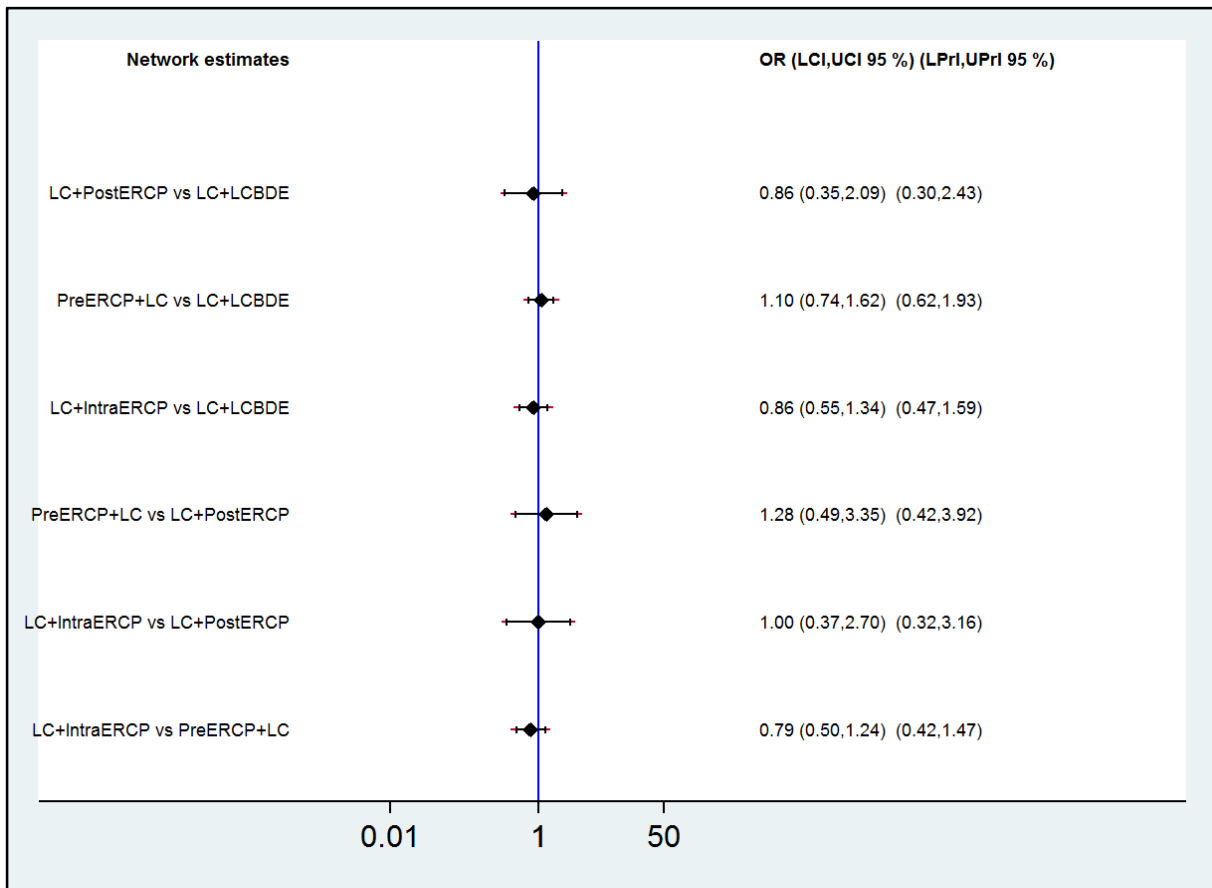

**Legend:** The results are reported as Odds ratios (ORs) and 95% confidence intervals (CIs). The blue line (line of null effect) is equal to 1. The solid black lines represent the CIs while the diamond summarizes the ORs. For each pairwise comparison, the forest plot should be read as following: if the diamond with the entire CI did not reach the blue line of null effect, there is a significant difference. If the entire CI is on the left of the null effect, the event rate is significantly higher in the “intervention arm” while, when the entire CI is on the right, the event is statistically more frequent in the “reference arm”. When the entire CI crosses the line of null effect, the difference between the two procedures compared is not statistically significant. In addition, a red line reports the Predictive Interval (Pri), namely the interval within which the estimate of a future study is expected to be. Legend: LC: Laparoscopic Cholecystectomy; LCDBE: Laparoscopic Common Bile Duct Exploration; PostERCP: Postoperative Endoscopic Retrograde Cholangiopancreatography; PreERCP: Preoperative Endoscopic Retrograde Cholangiopancreatography; IntraERCP: Intraoperative Endoscopic Retrograde Cholangiopancreatography.

**Panel C:** Overall morbidity rate

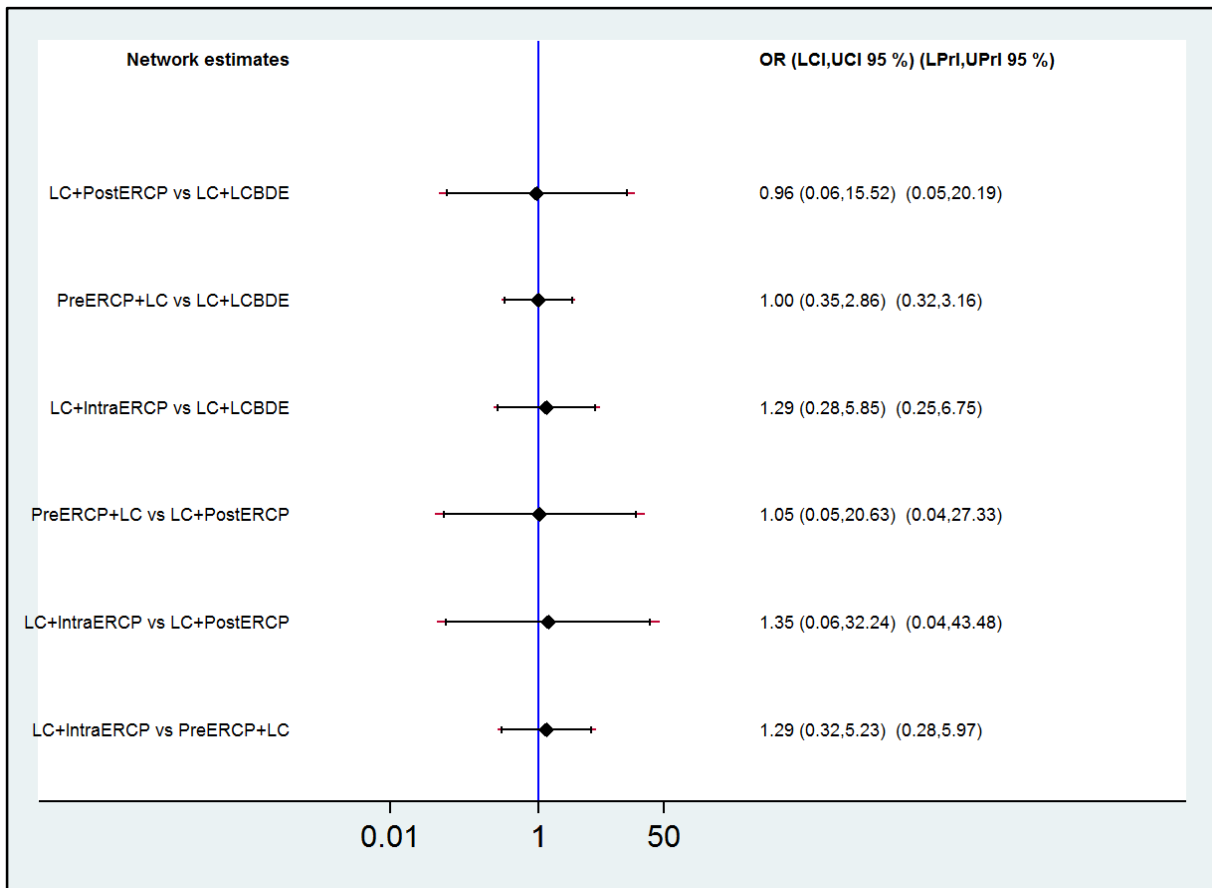

**Legend:** The results are reported as Odds ratios (ORs) and 95% confidence intervals (CIs). The blue line (line of null effect) is equal to 1. The solid black lines represent the CIs while the diamond summarizes the ORs. For each pairwise comparison, the forest plot should be read as following: if the diamond with the entire CI did not reach the blue line of null effect, there is a significant difference. If the entire CI is on the left of the null effect, the event rate is significantly higher in the “intervention arm” while, when the entire CI is on the right, the event is statistically more frequent in the “reference arm”. When the entire CI crosses the line of null effect, the difference between the two procedures compared is not statistically significant. In addition, a red line reports the Predictive Interval (PrI), namely the interval within which the estimate of a future study is expected to be. Legend: LC: Laparoscopic Cholecystectomy; LCDBE: Laparoscopic Common Bile Duct Exploration; PostERCP: Postoperative Endoscopic Retrograde Cholangiopancreatography; PreERCP: Preoperative Endoscopic Retrograde Cholangiopancreatography; IntraERCP: Intraoperative Endoscopic Retrograde Cholangiopancreatography.

**Panel D. Acute pancreatitis**

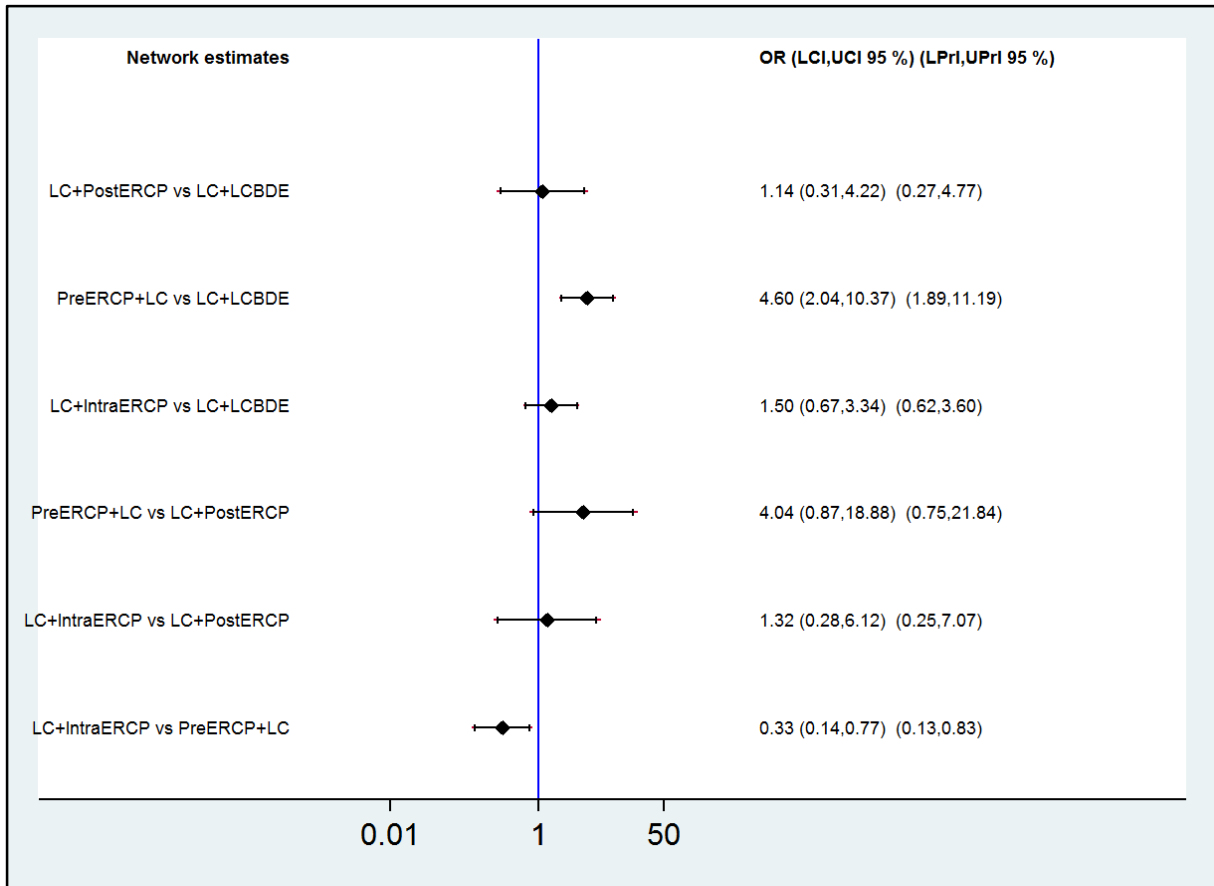

**Legend:** The results are reported as Odds ratios (ORs) and 95% confidence intervals (CIs). The blue line (line of null effect) is equal to 1. The solid black lines represent the CIs while the diamond summarizes the ORs. For each pairwise comparison, the forest plot should be read as following: if the diamond with the entire CI did not reach the blue line of null effect, there is a significant difference. If the entire CI is on the left of the null effect, the event rate is significantly higher in the “intervention arm” while, when the entire CI is on the right, the event is statistically more frequent in the “reference arm”. When the entire CI crosses the line of null effect, the difference between the two procedures compared is not statistically significant. In addition, a red line reports the Predictive Interval (PrI), namely the interval within which the estimate of a future study is expected to be. Legend: LC: Laparoscopic Cholecystectomy; LCDBE: Laparoscopic Common Bile Duct Exploration; PostERCP: Postoperative Endoscopic Retrograde Cholangiopancreatography; PreERCP: Preoperative Endoscopic Retrograde Cholangiopancreatography; IntraERCP: Intraoperative Endoscopic Retrograde Cholangiopancreatography.

**Panel E. Biliary leak**

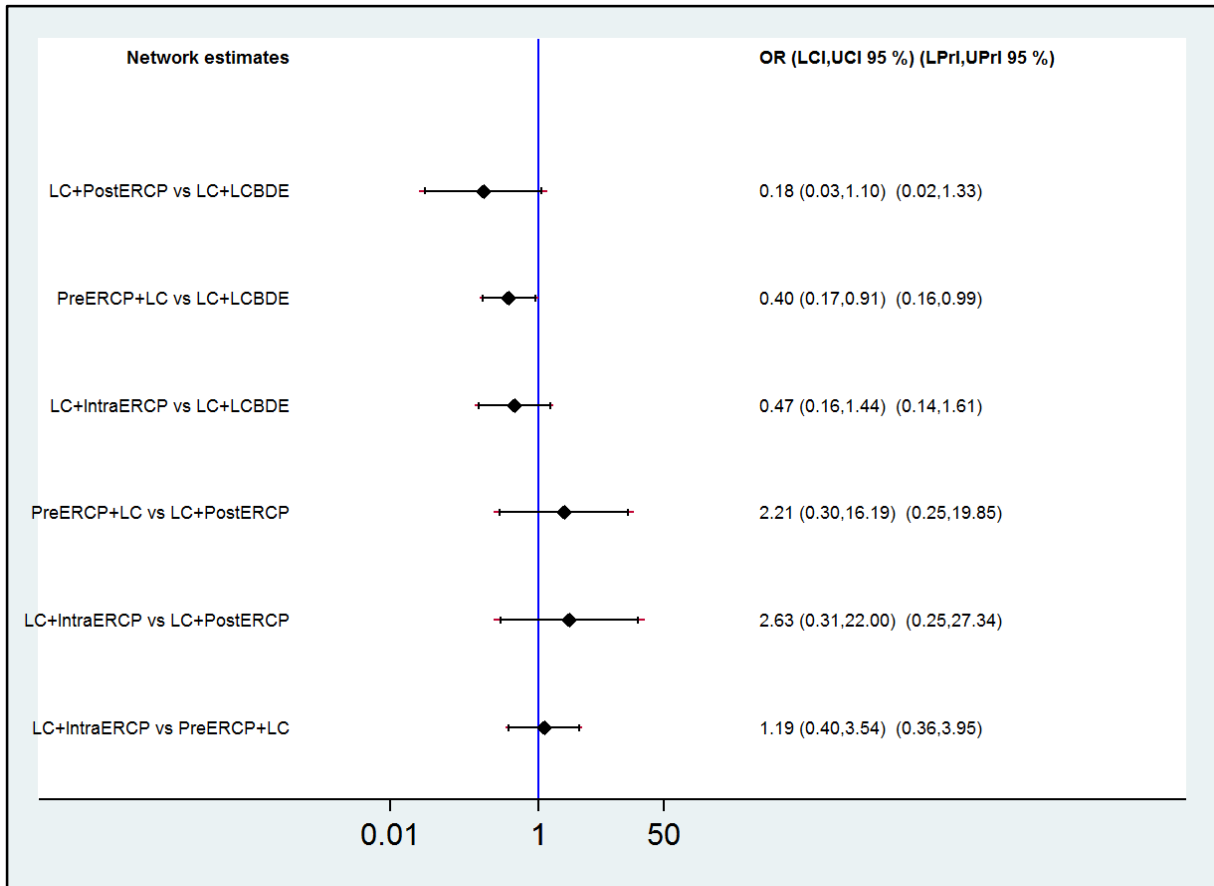

**Legend:** The results are reported as Odds ratios (ORs) and 95% confidence intervals (CIs). The blue line (line of null effect) is equal to 1. The solid black lines represent the CIs while the diamond summarizes the ORs. For each pairwise comparison, the forest plot should be read as following: if the diamond with the entire CI did not reach the blue line of null effect, there is a significant difference. If the entire CI is on the left of the null effect, the event rate is significantly higher in the “intervention arm” while, when the entire CI is on the right, the event is statistically more frequent in the “reference arm”. When the entire CI crosses the line of null effect, the difference between the two procedures compared is not statistically significant. In addition, a red line reports the Predictive Interval (PrI), namely the interval within which the estimate of a future study is expected to be. Legend: LC: Laparoscopic Cholecystectomy; LCBDE: Laparoscopic Common Bile Duct Exploration; PostERCP: Postoperative Endoscopic Retrograde Cholangiopancreatography; PreERCP: Preoperative Endoscopic Retrograde Cholangiopancreatography; IntraERCP: Intraoperative Endoscopic Retrograde Cholangiopancreatography.

**Panel F. Overall bleeding**

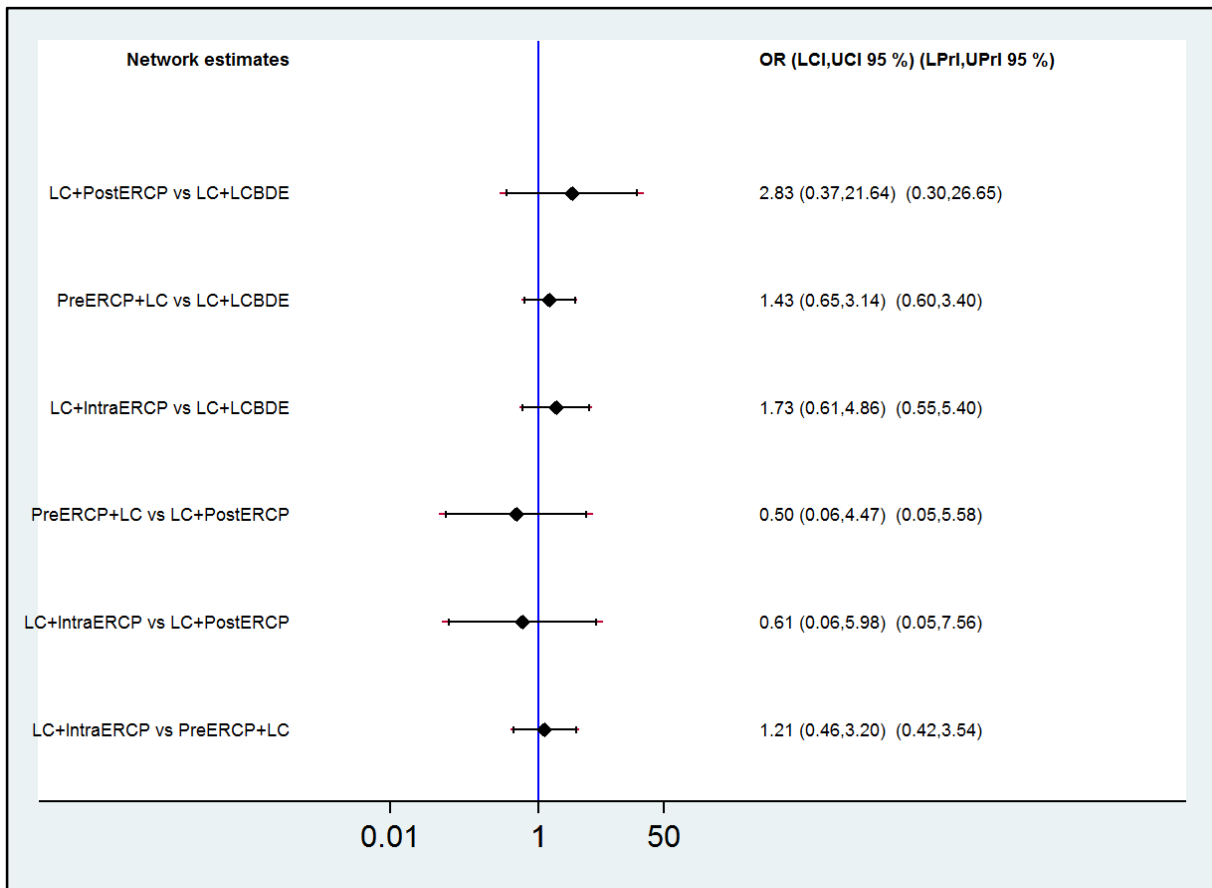

**Legend:** The results are reported as Odds ratios (ORs) and 95% confidence intervals (CIs). The blue line (line of null effect) is equal to 1. The solid black lines represent the CIs while the diamond summarizes the ORs. For each pairwise comparison, the forest plot should be read as following: if the diamond with the entire CI did not reach the blue line of null effect, there is a significant difference. If the entire CI is on the left of the null effect, the event rate is significantly higher in the “intervention arm” while, when the entire CI is on the right, the event is statistically more frequent in the “reference arm”. When the entire CI crosses the line of null effect, the difference between the two procedures compared is not statistically significant. In addition, a red line reports the Predictive Interval (Pri), namely the interval within which the estimate of a future study is expected to be. Legend: LC: Laparoscopic Cholecystectomy; LCDBE: Laparoscopic Common Bile Duct Exploration; PostERCP: Postoperative Endoscopic Retrograde Cholangiopancreatography; PreERCP: Preoperative Endoscopic Retrograde Cholangiopancreatography; IntraERCP: Intraoperative Endoscopic Retrograde Cholangiopancreatography.



**Panel G.** Overall operative time

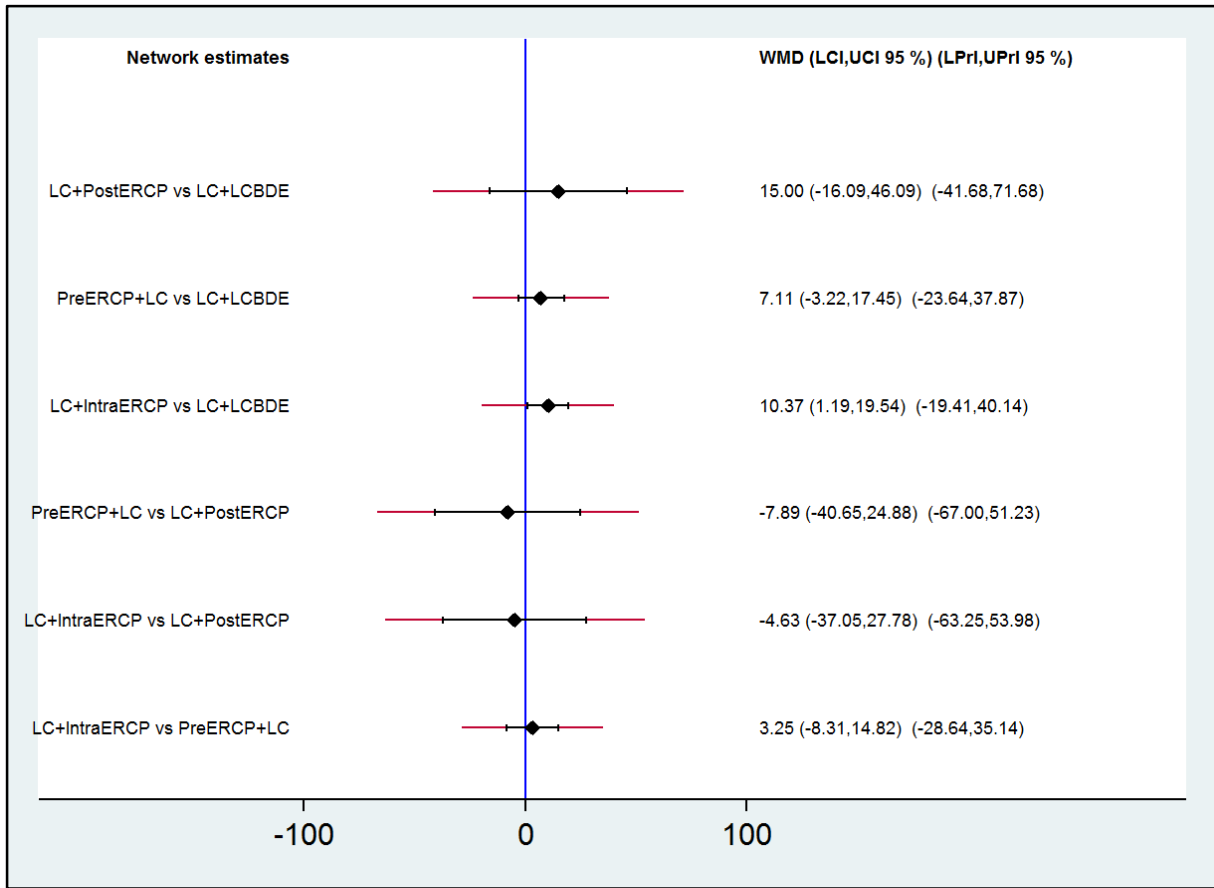

**Legend:** The results are reported as Weighted Mean Difference (WMD) and 95% confidence intervals (CIs). The blue line (line of null effect) is equal to 0. The solid black lines represent the CIs while the diamond summarizes the ORs. For each pairwise comparison, the forest plot should be read as following: if the diamond with the entire CI did not reach the blue line of null effect, there is a significant difference. If the entire CI is on the left of the null effect, the value is significantly higher in the “intervention arm” while, when the entire CI is on the right, the value is statistically higher in the “reference arm”. When the entire CI crosses the line of null effect, the difference between the two procedures compared is not statistically significant. In addition, a red line reports the Predictive Interval (PrI), namely the interval within which the estimate of a future study is expected to be. Legend: LC: Laparoscopic Cholecystectomy; LCBDE: Laparoscopic Common Bile Duct Exploration; PostERCP: Postoperative Endoscopic Retrograde Cholangiopancreatography; PreERCP: Preoperative Endoscopic Retrograde Cholangiopancreatography; IntraERCP: Intraoperative Endoscopic Retrograde Cholangiopancreatography.

**Panel H.** Length of hospital stay

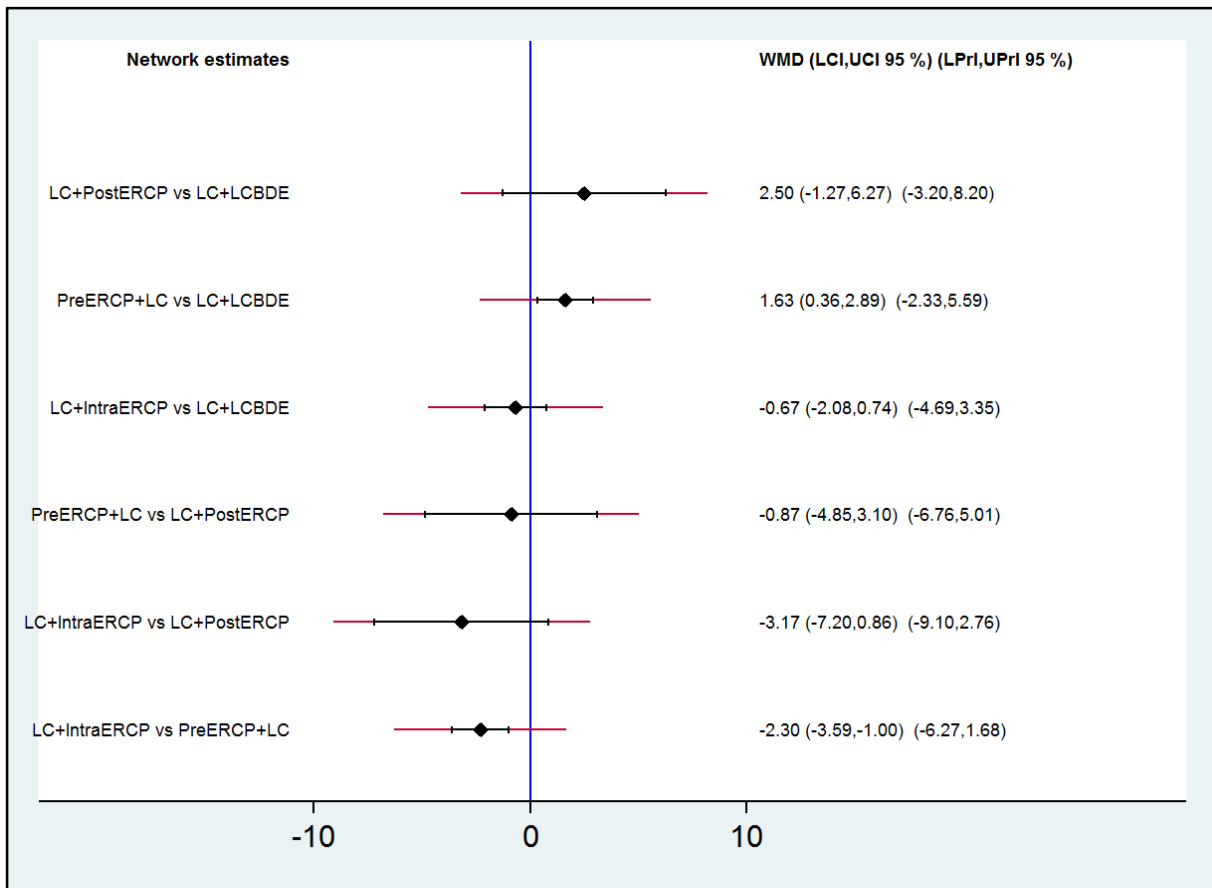

**Legend:** The results are reported as Weighted Mean Difference (WMD) and 95% confidence intervals (CIs). The blue line (line of null effect) is equal to 0. The solid black lines represent the CIs while the diamond summarizes the ORs. For each pairwise comparison, the forest plot should be read as following: if the diamond with the entire CI did not reach the blue line of null effect, there is a significant difference. If the entire CI is on the left of the null effect, the value is significantly higher in the “intervention arm” while, when the entire CI is on the right, the value is statistically higher in the “reference arm”. When the entire CI crosses the line of null effect, the difference between the two procedures compared is not statistically significant. In addition, a red line reports the Predictive Interval (PrI), namely the interval within which the estimate of a future study is expected to be. Legend: LC: Laparoscopic Cholecystectomy; LCBDE: Laparoscopic Common Bile Duct Exploration; PostERCP: Postoperative Endoscopic Retrograde Cholangiopancreatography; PreERCP: Preoperative Endoscopic Retrograde Cholangiopancreatography; IntraERCP: Intraoperative Endoscopic Retrograde Cholangiopancreatography.

**Panel I. Total costs**

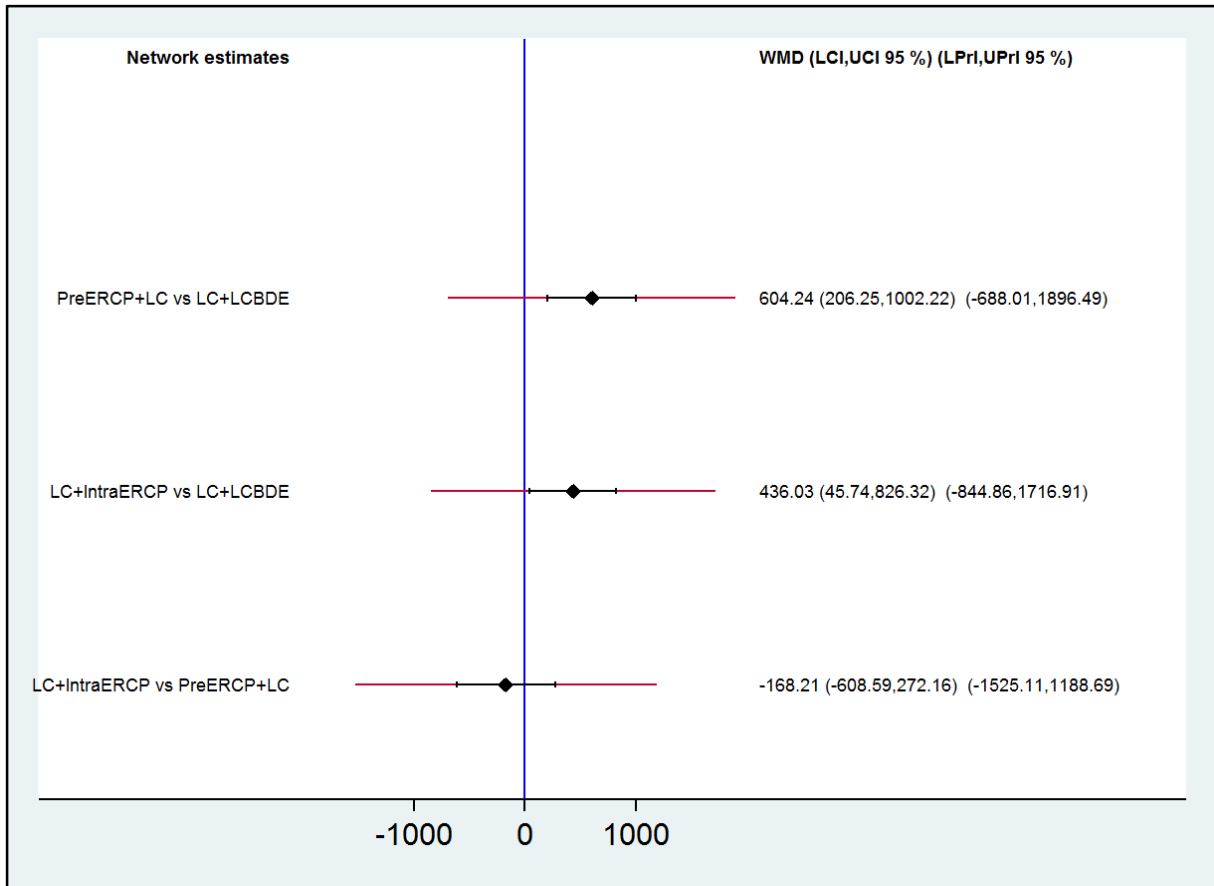

**Legend:** The results are reported as Weighted Mean Difference (WMD) and 95% confidence intervals (CIs). The blue line (line of null effect) is equal to 0. The solid black lines represent the CIs while the diamond summarizes the ORs. For each pairwise comparison, the forest plot should be read as following: if the diamond with the entire CI did not reach the blue line of null effect, there is a significant difference. If the entire CI is on the left of the null effect, the value is significantly higher in the “intervention arm” while, when the entire CI is on the right, the value is statistically higher in the “reference arm”. When the entire CI crosses the line of null effect, the difference between the two procedures compared is not statistically significant. In addition, a red line reports the Predictive Interval (Pri), namely the interval within which the estimate of a future study is expected to be. Legend: LC: Laparoscopic Cholecystectomy; LCDBE: Laparoscopic Common Bile Duct Exploration; PostERCP: Postoperative Endoscopic Retrograde Cholangiopancreatography; PreERCP: Preoperative Endoscopic Retrograde Cholangiopancreatography; IntraERCP: Intraoperative Endoscopic Retrograde Cholangiopancreatography.

**eTable 2.** The ranking of the approaches ranking for all outcomes. The probability in percentages of the ranking of the approaches from best to worst is reported in the row

| Outcomes of interest   | Probability Ranking for each approach (%) |                 |                 |       |               |                 |                 |       |              |                 |                 |       |                |                 |                 |       |
|------------------------|-------------------------------------------|-----------------|-----------------|-------|---------------|-----------------|-----------------|-------|--------------|-----------------|-----------------|-------|----------------|-----------------|-----------------|-------|
|                        | LC + LCBDE                                |                 |                 |       | LC + PostERCP |                 |                 |       | LC + PreERCP |                 |                 |       | LC + IntraERCP |                 |                 |       |
|                        | Best                                      | 2 <sup>nd</sup> | 3 <sup>rd</sup> | Worst | Best          | 2 <sup>nd</sup> | 3 <sup>rd</sup> | Worst | Best         | 2 <sup>nd</sup> | 3 <sup>rd</sup> | Worst | Best           | 2 <sup>nd</sup> | 3 <sup>rd</sup> | Worst |
| Success rate           | 12.9                                      | 45.7            | 37.1            | 4.3   | 6.5           | 5.8             | 7.3             | 80.4  | 7.5          | 31.3            | 47.8            | 13.4  | 73.1           | 17.2            | 7.8             | 1.9   |
| Overall morbidity      | 8.3                                       | 32.1            | 42.5            | 17.1  | 48.3          | 15.6            | 11.9            | 24.2  | 4.6          | 13.9            | 29.7            | 51.8  | 38.8           | 38.4            | 15.9            | 6.9   |
| Overall mortality      | 18.4                                      | 37.7            | 31.7            | 12.2  | 43.4          | 10.4            | 10.7            | 35.5  | 21.5         | 31.9            | 33.1            | 13.5  | 16.7           | 20.0            | 24.5            | 38.8  |
| Acute Pancreatitis     | 48.5                                      | 44.0            | 7.5             | 0     | 39.7          | 25.0            | 31.4            | 3.9   | 0            | 0.2             | 4.1             | 95.7  | 11.8           | 30.8            | 57.0            | 0.4   |
| Biliary Leak           | 0                                         | 0.5             | 13.8            | 85.7  | 73.8          | 13.0            | 11.1            | 2.1   | 14.1         | 51.9            | 32.8            | 1.2   | 12.1           | 34.6            | 42.3            | 11.0  |
| Overall bleeding       | 62.0                                      | 27.2            | 9.6             | 1.2   | 13.6          | 9.6             | 13.2            | 63.6  | 13.2         | 40.7            | 36.2            | 9.9   | 11.2           | 22.5            | 41.0            | 25.3  |
| Overall operative time | 72.2                                      | 25.2            | 2.1             | 0     | 18.4          | 10.9            | 11.6            | 59.1  | 8.2          | 44.1            | 36.0            | 11.7  | 0.7            | 19.8            | 50.3            | 29.2  |
| LOS                    | 14.1                                      | 75.7            | 10.2            | 0     | 5.2           | 7.0             | 22.1            | 65.7  | 0            | 0.5             | 65.2            | 34.3  | 80.7           | 16.8            | 2.5             | 0     |
| Total costs (\$)       | 97.9                                      | 2.0             | 0.1             | NA    | NA            | NA              | NA              | NA    | 0.3          | 22.3            | 77.4            | NA    | 1.8            | 75.7            | 22.5            | NA    |

**Legend:** LC: Laparoscopic Cholecystectomy; LCBDE: Laparoscopic Common Bile Duct Exploration; PostERCP: Postoperative Endoscopic Retrograde Cholangiopancreatography; PreERCP: Preoperative Endoscopic Retrograde Cholangiopancreatography; IntraERCP: Intraoperative Endoscopic Retrograde Cholangiopancreatography LOS: Length of Postoperative Hospital Stay; \$: Dollars; NA: not applicable.

**eFigure 6.** Cluster rank combined the surface under the cumulative ranking curve (SUCRA) values, success rate and mortality rate. The y axis reports the SUCRA values as a percentage of “safety” (mortality rate). The x axis reports the efficacy (success rate). Different colors identify the different clusters.

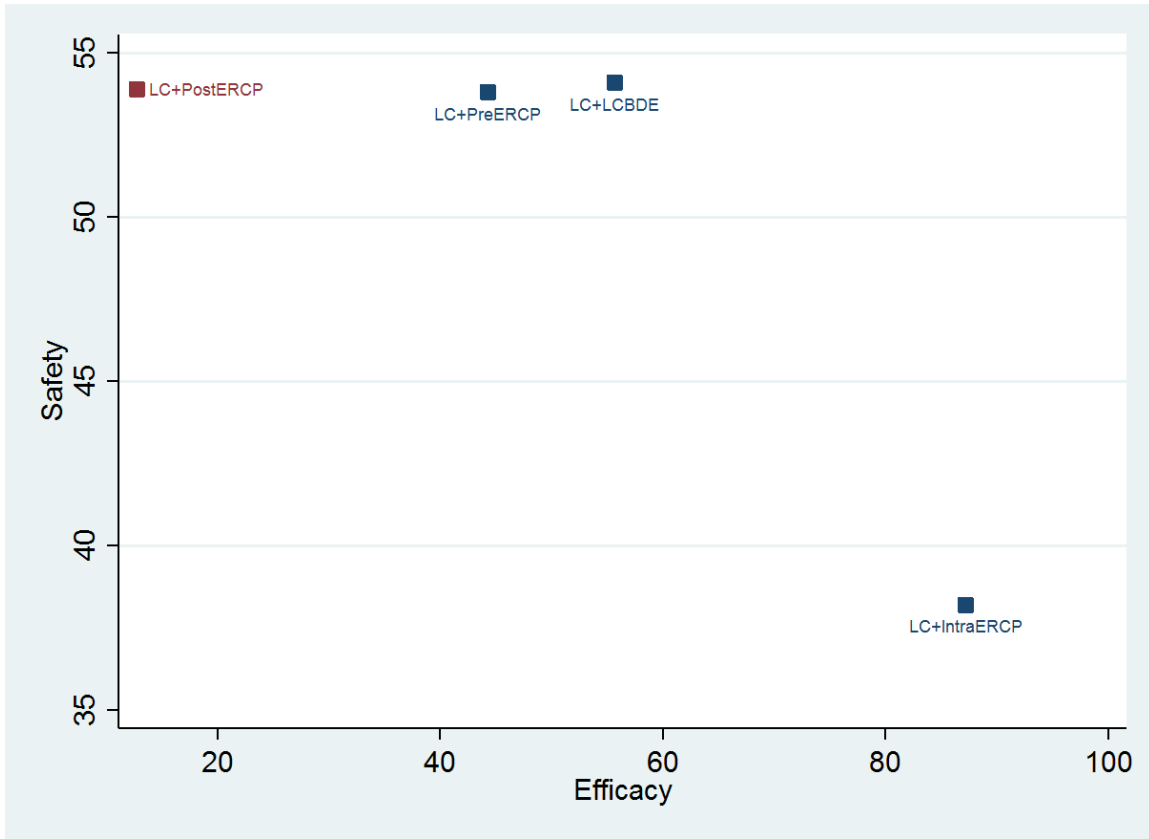

Legend: LC: Laparoscopic Cholecystectomy; LCDBE: Laparoscopic Common Bile Duct Exploration; PostERCP: Postoperative Endoscopic Retrograde Cholangiopancreatography; PreERCP: Preoperative Endoscopic Retrograde Cholangiopancreatography; IntraERCP: Intraoperative Endoscopic Retrograde Cholangiopancreatography.

**eFigure 7.** Funnel plots of the network estimates of all outcomes

**Panel A.** Success rate

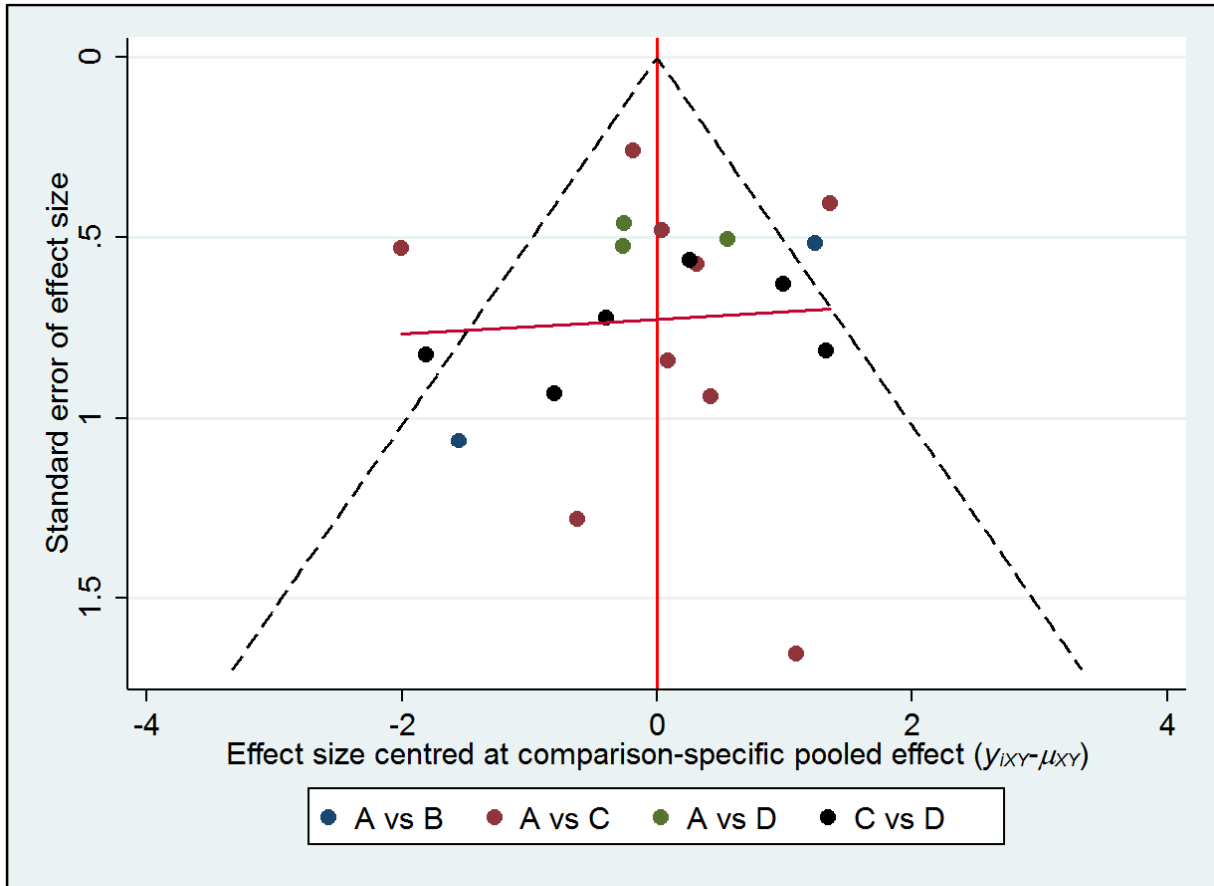

**Legend:** Funnel plots of the network estimates of all outcomes. In the comparison-adjusted funnel plot, the horizontal axis shows the difference of each  $i$ -study estimate  $Y_{iXY}$  from the summary effect for the respective comparison ( $Y_{iXY} - \mu_{XY}$ ) while the vertical axis presents the measure of dispersion of  $Y_{iXY}$ , namely the standard error of the effect size. The red line shows the null hypothesis. Each point represents a direct comparison; different colors correspond to different comparisons. The dashed black line represents the 95% confidence interval. The horizontal line represents the regression line; the dark red regression line demonstrates that no asymmetry is present; arm A= Laparoscopic Cholecystectomy (LC) plus Laparoscopic Common Bile Duct Exploration (LCDBE); Arm B= LC plus Postoperative Endoscopic Retrograde Cholangiopancreatography (PostERCP); arm C= LC plus Preoperative Endoscopic Retrograde Cholangiopancreatography (PreERCP); arm D= LC plus Intraoperative Endoscopic Retrograde Cholangiopancreatography (IntraERCP).

Panel B. Overall mortality rate

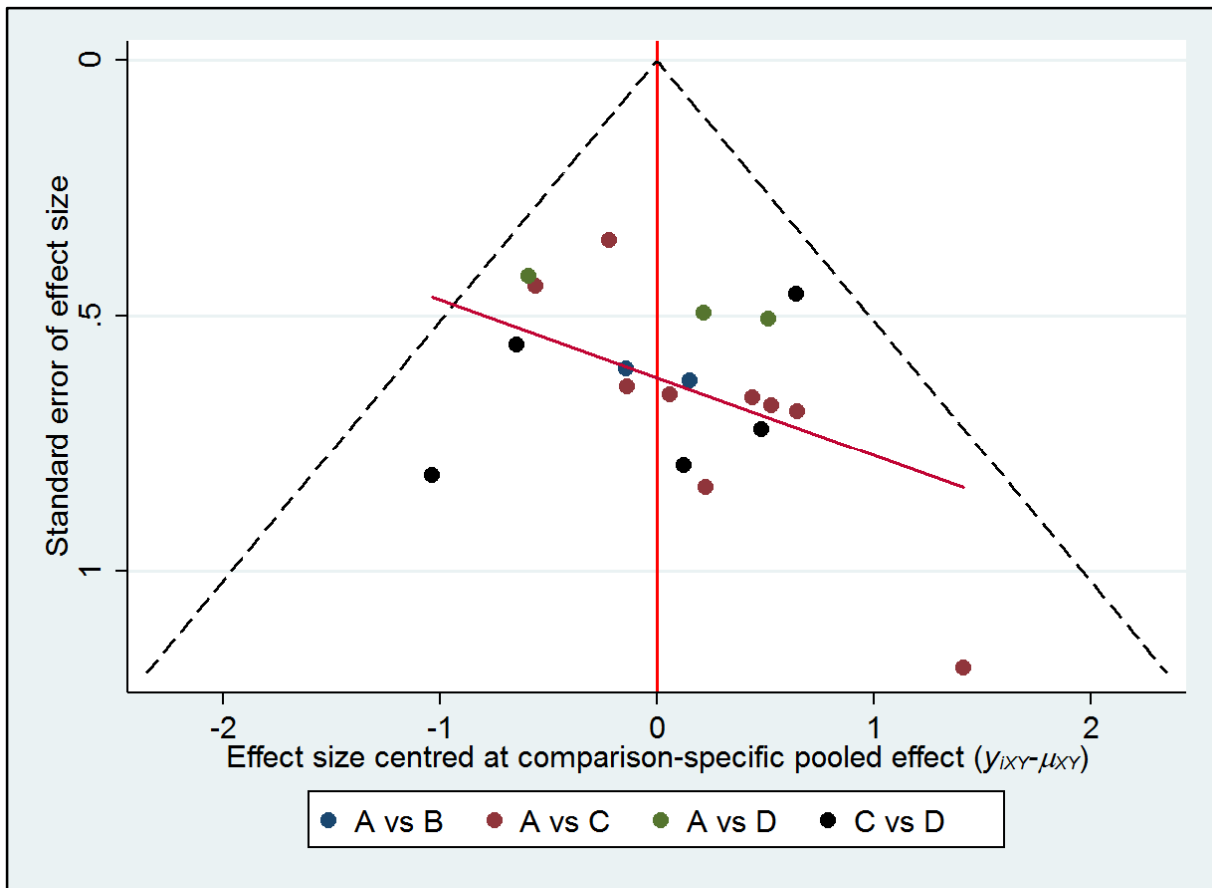

**Legend:** Funnel plots of the network estimates of all outcomes. In the comparison-adjusted funnel plot, the horizontal axis shows the difference of each  $i$ -study estimate  $Y_{iXY}$  from the summary effect for the respective comparison ( $Y_{iXY} - \mu_{XY}$ ) while the vertical axis presents the measure of dispersion of  $Y_{iXY}$ , namely the standard error of the effect size. The red line shows the null hypothesis. Each point represents a direct comparison; different colors correspond to different comparisons. The dashed black line represents the 95% confidence interval. The horizontal line represents the regression line; the dark red regression line demonstrates that asymmetry is present and it was confirmed by Begg's test for "LC + PreERCP versus LC + IntraERCP" comparison ( $P=0.086$ ); arm A= Laparoscopic Cholecystectomy (LC) plus Laparoscopic Common Bile Duct Exploration (LCDBE); Arm B= LC plus Postoperative Endoscopic Retrograde Cholangiopancreatography (PostERCP); arm C= LC plus Preoperative Endoscopic Retrograde Cholangiopancreatography (PreERCP); arm D= LC plus Intraoperative Endoscopic Retrograde Cholangiopancreatography (IntraERCP).

Panel C. Overall morbidity rate

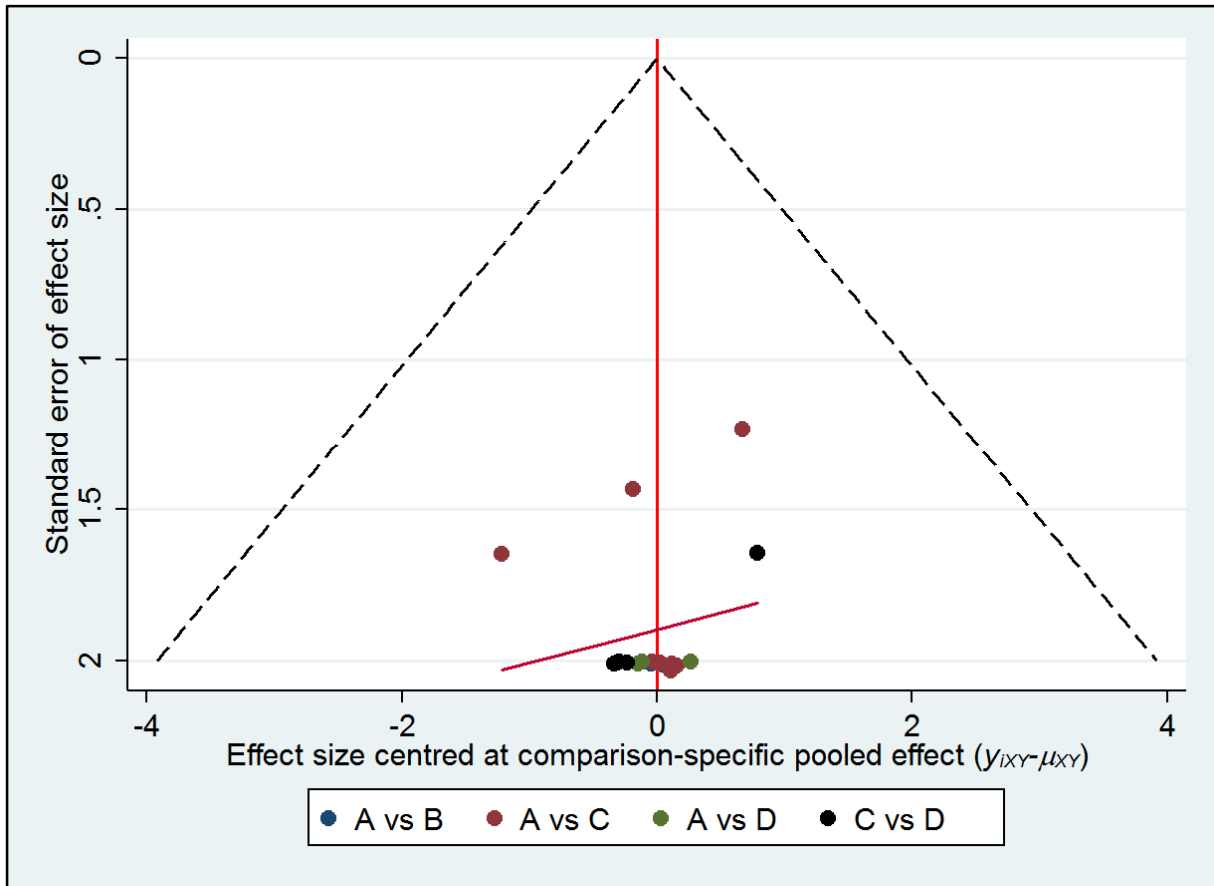

**Legend:** Funnel plots of the network estimates of all outcomes. In the comparison-adjusted funnel plot, the horizontal axis shows the difference of each  $i$ -study estimate  $Y_{iXY}$  from the summary effect for the respective comparison ( $Y_{iXY} - \mu_{XY}$ ) while the vertical axis presents the measure of dispersion of  $Y_{iXY}$ , namely the standard error of the effect size. The red line shows the null hypothesis. Each point represents a direct comparison; different colors correspond to different comparisons. The dashed black line represents the 95% confidence interval. The horizontal line represents the regression line; the dark red regression line demonstrates that asymmetry is present but it did not is confirmed by Begg's test; arm A= Laparoscopic Cholecystectomy (LC) plus Laparoscopic Common Bile Duct Exploration (LCDBE); Arm B= LC plus Postoperative Endoscopic Retrograde Cholangiopancreatography (PostERCP); arm C= LC plus Preoperative Endoscopic Retrograde Cholangiopancreatography (PreERCP); arm D= LC plus Intraoperative Endoscopic Retrograde Cholangiopancreatography (IntraERCP).



Panel D. Acute pancreatitis

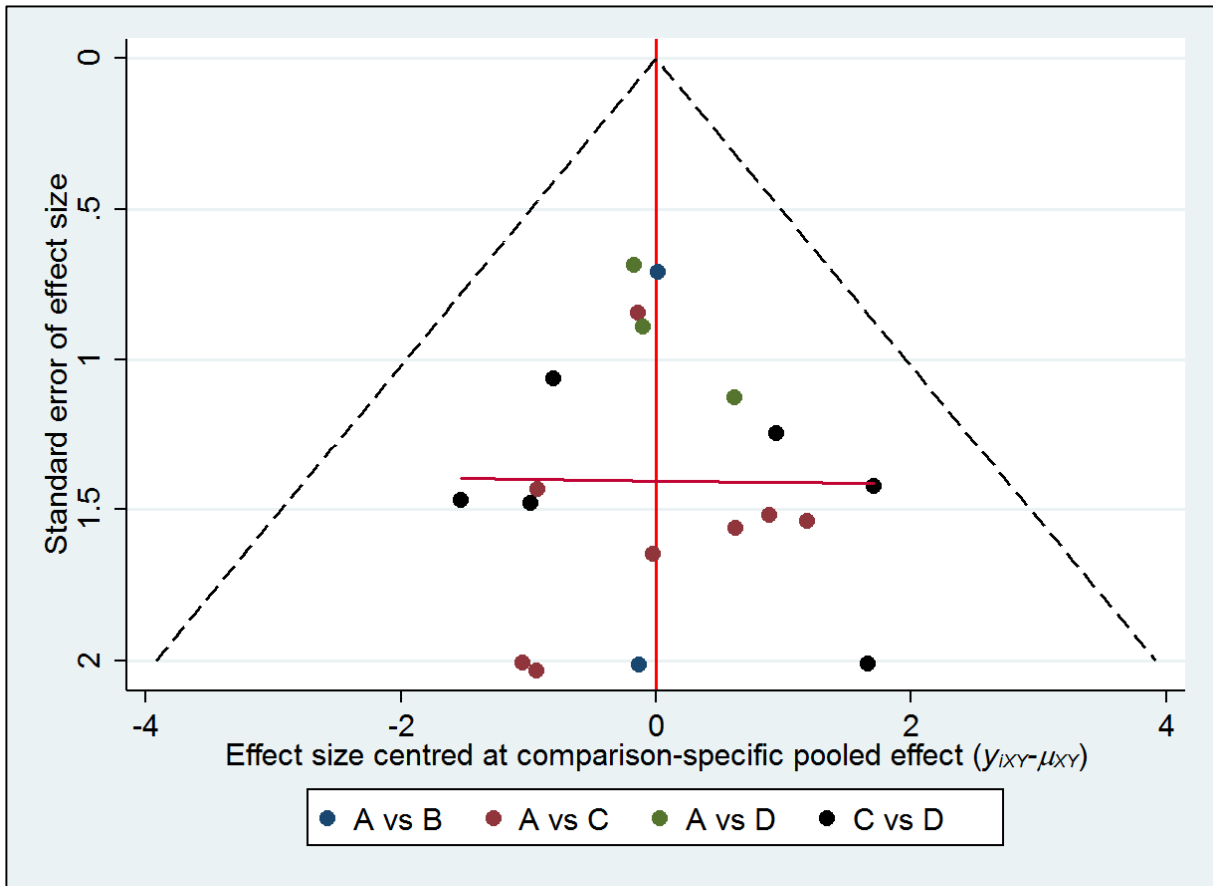

**Legend:** Funnel plots of the network estimates of all outcomes. In the comparison-adjusted funnel plot, the horizontal axis shows the difference of each  $i$ -study estimate  $Y_{iXY}$  from the summary effect for the respective comparison ( $Y_{iXY} - \mu_{XY}$ ) while the vertical axis presents the measure of dispersion of  $Y_{iXY}$ , namely the standard error of the effect size. The red line shows the null hypothesis. Each point represents a direct comparison; different colors correspond to different comparisons. The dashed black line represents the 95% confidence interval. The horizontal line represents the regression line; the dark red regression line demonstrates that no asymmetry is present but Begg's test shows that "LC + LCBDE versus LC + IntraERCP" had a significant small study effect ( $P=0.029$ ); arm A= Laparoscopic Cholecystectomy (LC) plus Laparoscopic Common Bile Duct Exploration (LCBDE); Arm B= LC plus Postoperative Endoscopic Retrograde Cholangiopancreatography (PostERCP); arm C= LC plus Preoperative Endoscopic Retrograde Cholangiopancreatography (PreERCP); arm D= LC plus Intraoperative Endoscopic Retrograde Cholangiopancreatography (IntraERCP).

Panel E. Biliary leak

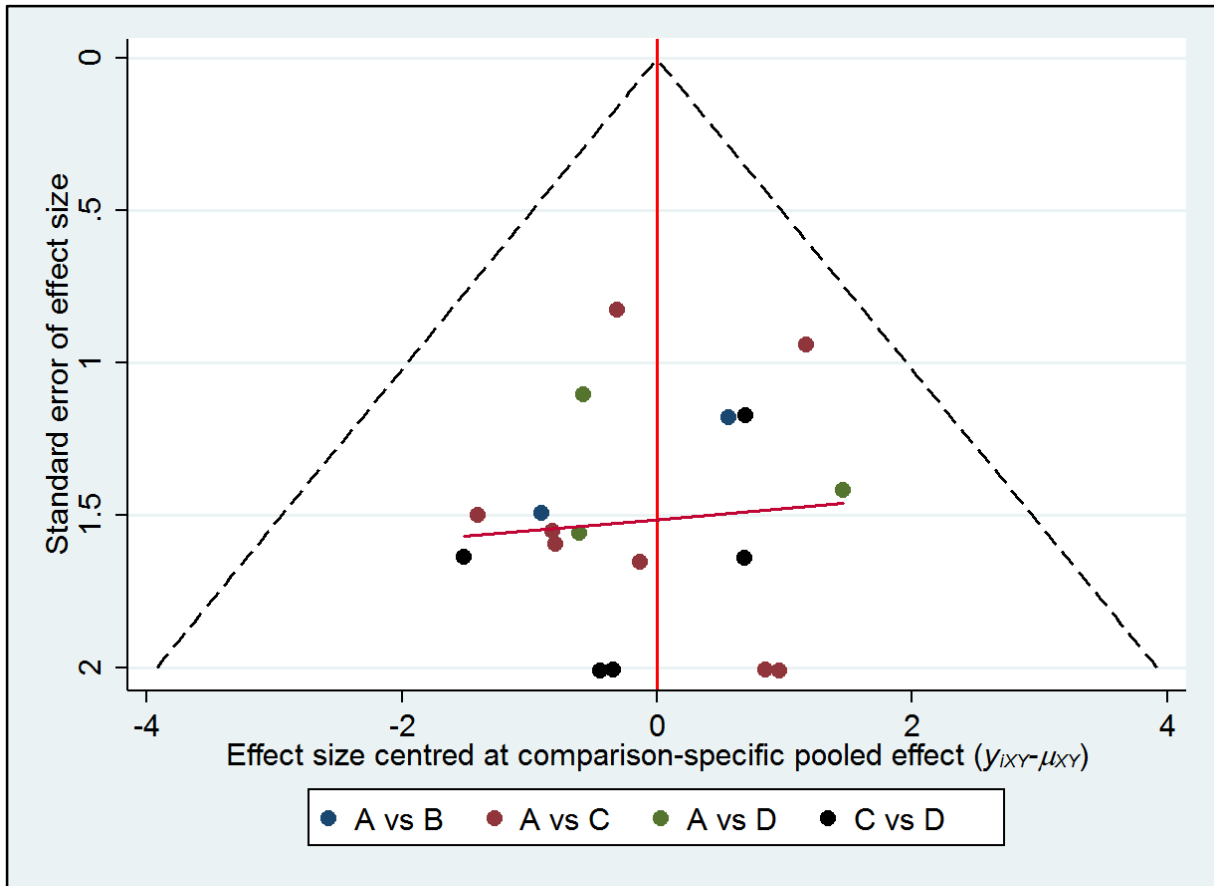

**Legend:** Funnel plots of the network estimates of all outcomes. In the comparison-adjusted funnel plot, the horizontal axis shows the difference of each *i*-study estimate  $Y_{iXY}$  from the summary effect for the respective comparison ( $Y_{iXY} - \mu_{XY}$ ) while the vertical axis presents the measure of dispersion of  $Y_{iXY}$ , namely the standard error of the effect size. The red line shows the null hypothesis. Each point represents a direct comparison; different colors correspond to different comparisons. The dashed black line represents the 95% confidence interval. The horizontal line represents the regression line; the dark red regression line demonstrates that no asymmetry is present; arm A= Laparoscopic Cholecystectomy (LC) plus Laparoscopic Common Bile Duct Exploration (LCDBE); Arm B= LC plus Postoperative Endoscopic Retrograde Cholangiopancreatography (PostERCP); arm C= LC plus Preoperative Endoscopic Retrograde Cholangiopancreatography (PreERCP); arm D= LC plus Intraoperative Endoscopic Retrograde Cholangiopancreatography (IntraERCP).

Panel F. Overall bleeding

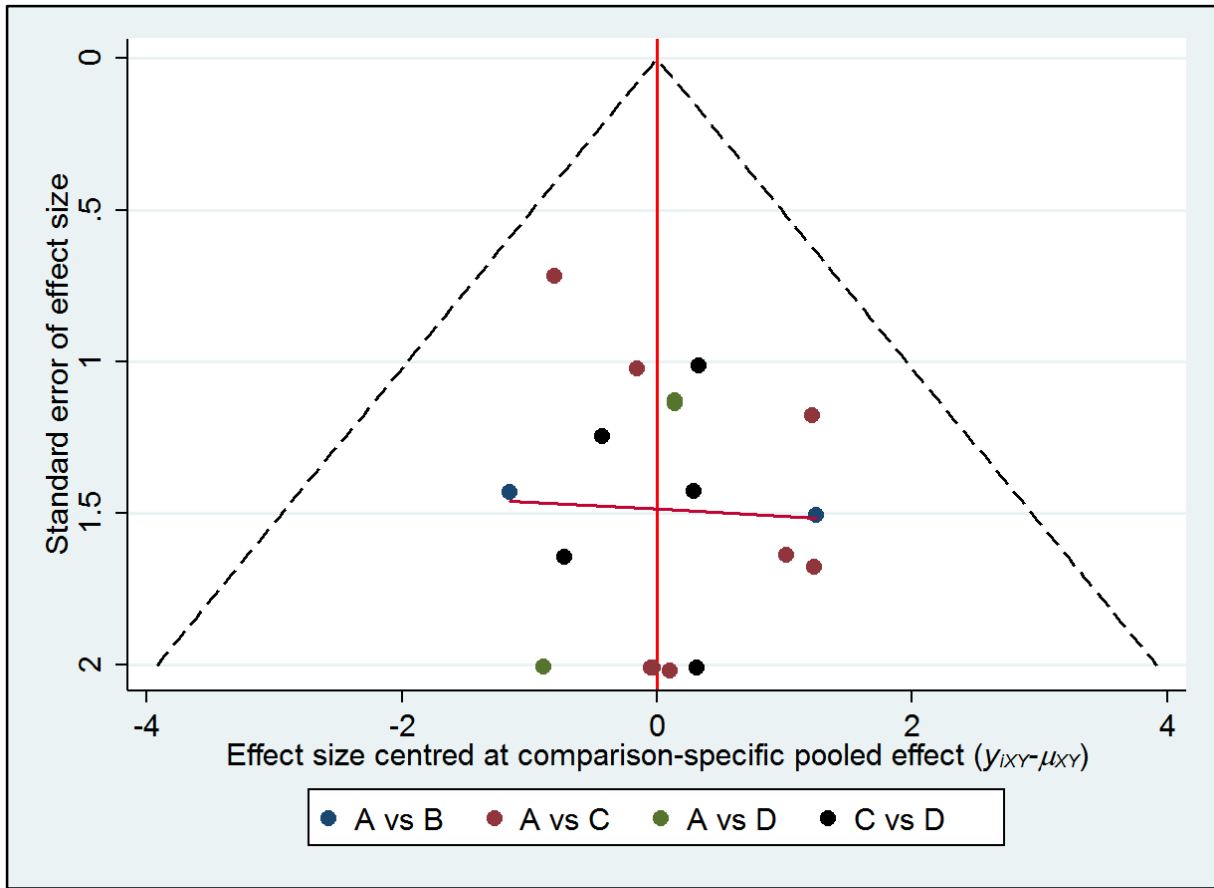

**Legend:** Funnel plots of the network estimates of all outcomes. In the comparison-adjusted funnel plot, the horizontal axis shows the difference of each *i*-study estimate  $Y_{iXY}$  from the summary effect for the respective comparison ( $Y_{iXY} - \mu_{XY}$ ) while the vertical axis presents the measure of dispersion of  $Y_{iXY}$ , namely the standard error of the effect size. The red line shows the null hypothesis. Each point represents a direct comparison; different colors correspond to different comparisons. The dashed black line represents the 95% confidence interval. The horizontal line represents the regression line; the dark red regression line demonstrates that no asymmetry is present; arm A= Laparoscopic Cholecystectomy (LC) plus Laparoscopic Common Bile Duct Exploration (LCDBE); Arm B= LC plus Postoperative Endoscopic Retrograde Cholangiopancreatography (PostERCP); arm C= LC plus Preoperative Endoscopic Retrograde Cholangiopancreatography (PreERCP); arm D= LC plus Intraoperative Endoscopic Retrograde Cholangiopancreatography (IntraERCP).

Panel G. Overall operative time

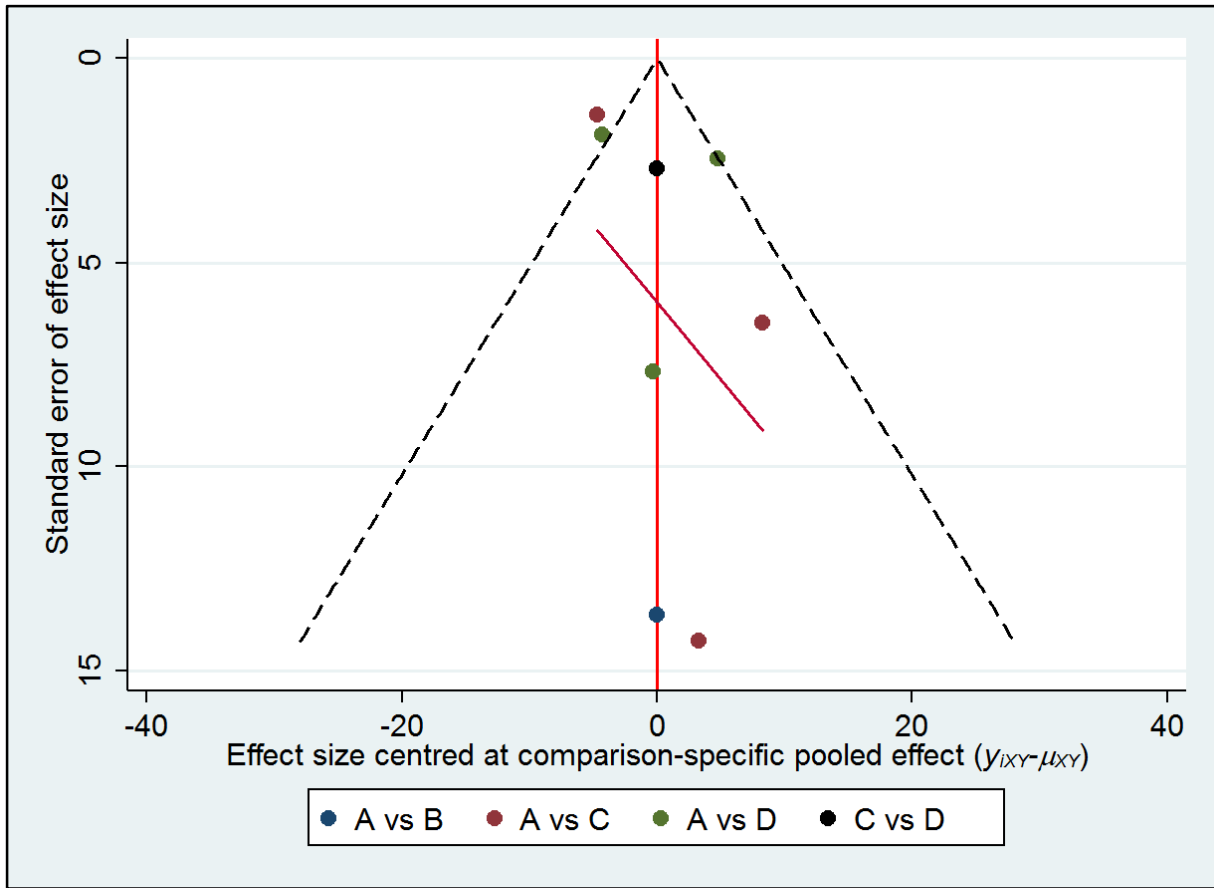

**Legend:** Funnel plots of the network estimates of all outcomes. In the comparison-adjusted funnel plot, the horizontal axis shows the difference of each  $i$ -study estimate  $Y_{iXY}$  from the summary effect for the respective comparison ( $Y_{iXY} - \mu_{XY}$ ) while the vertical axis presents the measure of dispersion of  $Y_{iXY}$ , namely the standard error of the effect size. The red line shows the null hypothesis. Each point represents a direct comparison; different colors correspond to different comparisons. The dashed black line represents the 95% confidence interval. The horizontal line represents the regression line; the dark regression line demonstrates that asymmetry is present; arm A= Laparoscopic Cholecystectomy (LC) plus Laparoscopic Common Bile Duct Exploration (LCDBE); Arm B= LC plus Postoperative Endoscopic Retrograde Cholangiopancreatography (PostERCP); arm C= LC plus Preoperative Endoscopic Retrograde Cholangiopancreatography (PreERCP); arm D= LC plus Intraoperative Endoscopic Retrograde Cholangiopancreatography (IntraERCP).

Panel H. Length of hospital stay

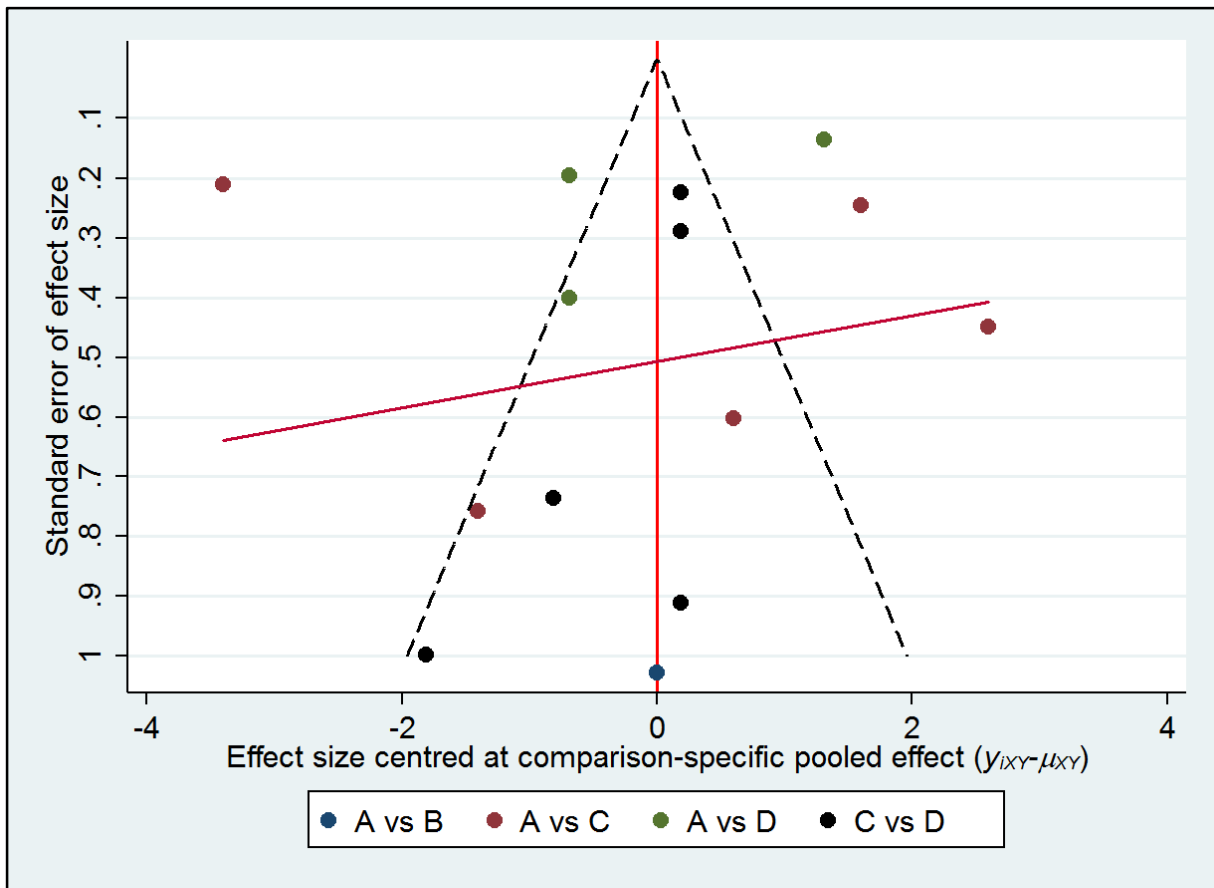

**Legend:** Funnel plots of the network estimates of all outcomes. In the comparison-adjusted funnel plot, the horizontal axis shows the difference of each *i*-study estimate  $Y_{iXY}$  from the summary effect for the respective comparison ( $Y_{iXY} - \mu_{XY}$ ) while the vertical axis presents the measure of dispersion of  $Y_{iXY}$ , namely the standard error of the effect size. The red line shows the null hypothesis. Each point represents a direct comparison; different colors correspond to different comparisons. The dashed black line represents the 95% confidence interval. The horizontal line represents the regression line; the dark regression line demonstrates that asymmetry is present; arm A= Laparoscopic Cholecystectomy (LC) plus Laparoscopic Common Bile Duct Exploration (LCDBE); Arm B= LC plus Postoperative Endoscopic Retrograde Cholangiopancreatography (PostERCP); arm C= LC plus Preoperative Endoscopic Retrograde Cholangiopancreatography (PreERCP); arm D= LC plus Intraoperative Endoscopic Retrograde Cholangiopancreatography (IntraERCP).

Panel I. Total cost

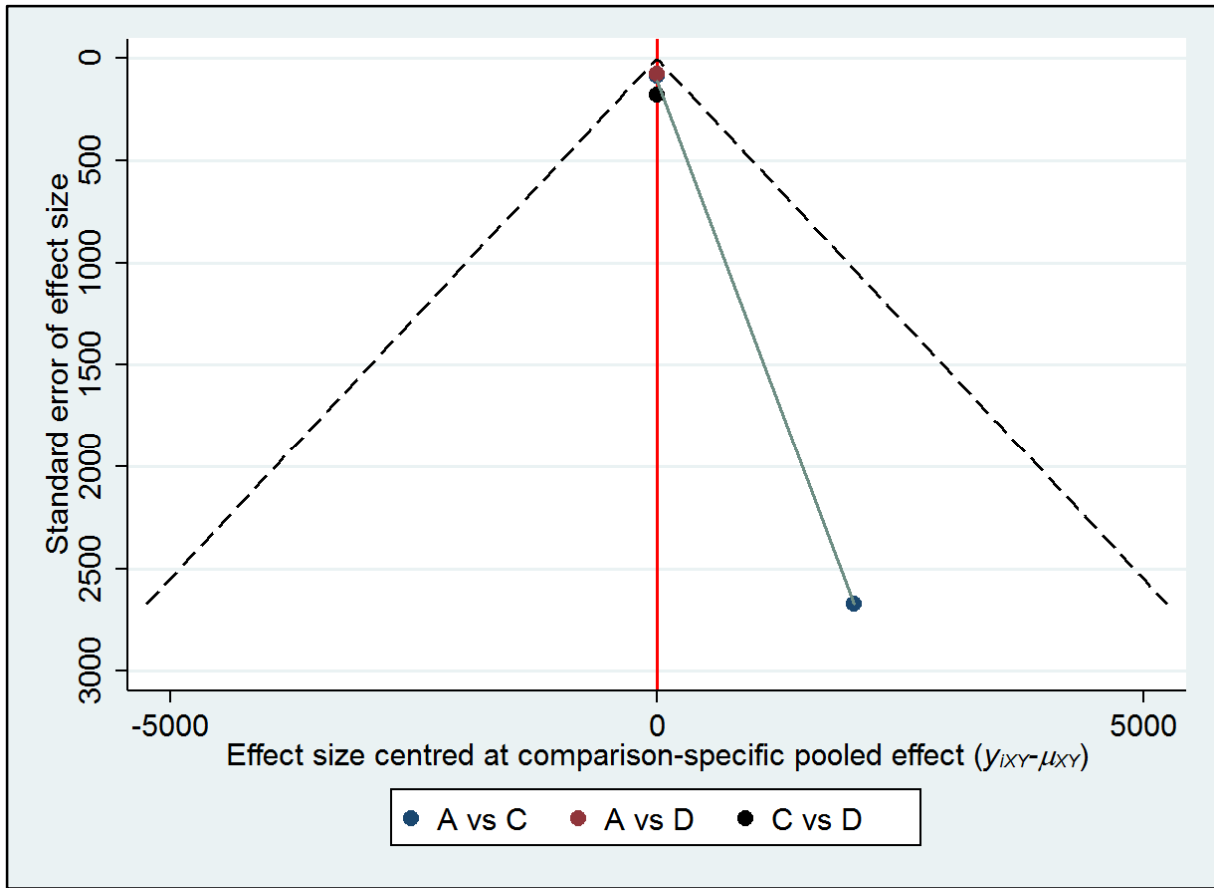

**Legend:** Funnel plots of the network estimates of all outcomes. In the comparison-adjusted funnel plot, the horizontal axis shows the difference of each  $i$ -study estimate  $Y_{iXY}$  from the summary effect for the respective comparison ( $Y_{iXY} - \mu_{XY}$ ) while the vertical axis presents the measure of dispersion of  $Y_{iXY}$ , namely the standard error of the effect size. The red line shows the null hypothesis. Each point represents a direct comparison; different colors correspond to different comparisons. The dashed black line represents the 95% confidence interval. The horizontal line represents the regression line; the dark regression line demonstrates that asymmetry is present; arm A= Laparoscopic Cholecystectomy (LC) plus Laparoscopic Common Bile Duct Exploration (LCDBE); Arm B= LC plus Postoperative Endoscopic Retrograde Cholangiopancreatography (PostERCP); arm C= LC plus Preoperative Endoscopic Retrograde Cholangiopancreatography (PreERCP); arm D= LC plus Intraoperative Endoscopic Retrograde Cholangiopancreatography (IntraERCP)

**eTable 3.** Meta-regression of confounding covariates influencing heterogeneity

| Covariates                            | Success rate ( $\beta$ , p value) |                 |             | Operative time in min ( $\beta$ , p value) |                 |                 | LOS in days ( $\beta$ , p value) |           |            |
|---------------------------------------|-----------------------------------|-----------------|-------------|--------------------------------------------|-----------------|-----------------|----------------------------------|-----------|------------|
|                                       | B vs A                            | C vs A          | D vs A      | B vs A                                     | C vs A          | D vs A          | B vs A                           | C vs A    | D vs A     |
| Years (increasing year)               | -0.92,<br>0.020                   | 0.25,0.065      | 0.10, 0.616 | *                                          | *               | -2.3,0.186      | *                                | 0.9,0.060 | 1.5,0.100  |
| Country (Western vs Eastern)          | *                                 | 0.25,0.796      | 2.8,0.016   | *                                          | *               | -<br>11.7,0.186 | *                                | *         | -2.9,0.508 |
| Patients (Proven vs Suspected stones) | *                                 | 2.63,<br><0.001 | 1.62,0.243  | *                                          | 8.1,0.138       | *               | *                                | 2.1,0.412 | 1.1,0.781  |
| Matching for Age (Yes vs No)          | *                                 | -0.67,0.402     | -0.80,0.382 | *                                          | -<br>27.1,0.139 | *               | *                                | 5.6,0.316 | 6.9,0.124  |
| Matching for Sex (Yes vs No)          | *                                 | -0.31,0.678     | -2.01,0.152 | *                                          | *               | *               | *                                | 5.9,0.114 | 6.3,0.216  |
| Risk of Bias (Yes vs No)              | *                                 | -0.18,0.715     | *           | *                                          | *               | *               | *                                | 4.9,0.296 | *          |
| Trans-cystic approach (increasing %)  | 3.98, 0.082                       | 1.82, 0.081     | 0.91,0.644  | *                                          | -13,0.221       | -3,4,0.856      | *                                | 3.1,0.217 | 1.1,0.673  |

**Legend:**  $\beta$ =regression coefficient; Arm A= Laparoscopic cholecystectomy plus laparoscopic common bile duct exploration; Arm B =Laparoscopic cholecystectomy plus post-operative endoscopic retrograde cholangio-pancreatography; Arm C= Preoperative endoscopic retrograde cholangio-pancreatography plus cholecystectomy; ; Arm D= Laparoscopic cholecystectomy plus endoscopic retrograde cholangio-pancreatography.

## References

1. Caldwell DM, Ades AE, Higgins JP. Simultaneous comparison of multiple treatments: combining direct and indirect evidence. *BMJ*. 2005;331:897-900.
2. Hutton B, Salanti G, Caldwell DM, Chaimani A, Schmid CH, Cameron C, Ioannidis JP, Straus S, Thorlund K, Jansen JP, Mulrow C, Catalá-López F, Gøtzsche PC, Dickersin K, Boutron I, Altman DG, Moher D. The PRISMA extension statement for reporting of systematic reviews incorporating network meta-analyses of health care interventions: checklist and explanations. *Ann Intern Med*. 2015;11:777-784.
3. Mills EJ, Ioannidis JP, Thorlund K, Schünemann HJ, Puhan MA, Guyatt GH. How to use an article reporting a multiple treatment comparison meta-analysis. *JAMA*. 2012;26;308:1246-1253.
4. Chaimani A, Higgins JP, Mavridis D, Spyridonos P, Salanti G. Graphical tools for network meta-analysis in STATA. *PLoS One*. 2013;8:e76654.
5. Bucher HC, Guyatt GH, Griffith LE, Walter SD. The results of direct and indirect treatment comparisons in meta-analysis of randomised controlled trials. *J Clin Epidemiol*. 1997;50:683-691.
6. Salanti G, Ades AE, Ioannidis JP. Graphical methods and numerical summaries for presenting results from multiple-treatment meta-analysis: an overview and tutorial. *J Clin Epidemiol*. 2011;64:163-171.
7. Turner RM, Davey J, Clarke MJ, Thompson SG, Higgins JP. Predicting the extent of heterogeneity in meta-analysis, using empirical data from the Cochrane Database of Systematic Reviews. *Int J Epidemiol*. 2012;41:818-827.
8. Egger M, Davey Smith G, Schneider M, Minder C. Bias in meta-analysis detected by a simple, graphical test. *BMJ*. 1997;315:629-634.
